# Supplementary material for: Patient-reported well-being in value-based care using tildrakizumab in a real-world setting: protocol of a multinational, phase IV, 1-cohort prospective observational study (the POSITIVE study)
Source: PubMed Central journal article supplement — BMJ Open. 2023 Feb 15;13(2):e060536. doi: 10.1136/bmjopen-2021-060536 (PMC9933754; doi:10.1136/bmjopen-2021-060536), 2023-02-15
Supplement: bmjopen-2021-060536.draft_revisions.pdf [file bmjopen-2021-060536.draft_revisions.pdf]

# BMJ Open

BMJ Open is committed to open peer review. As part of this commitment we make the peer review history of every article we publish publicly available.

When an article is published we post the peer reviewers' comments and the authors' responses online. We also post the versions of the paper that were used during peer review. These are the versions that the peer review comments apply to.

The versions of the paper that follow are the versions that were submitted during the peer review process. They are not the versions of record or the final published versions. They should not be cited or distributed as the published version of this manuscript.

BMJ Open is an open access journal and the full, final, typeset and author-corrected version of record of the manuscript is available on our site with no access controls, subscription charges or pay-per-view fees (<http://bmjopen.bmj.com>).

If you have any questions on BMJ Open's open peer review process please email [info.bmjopen@bmj.com](mailto:info.bmjopen@bmj.com)

# BMJ Open

## PATIENT-REPORTED WELL-BEING IN VALUE-BASED CARE USING TILDRAKIZUMAB IN A REAL WORLD SETTING: PROTOCOL OF A MULTI-NATIONAL, PHASE IV, 1 COHORT PROSPECTIVE OBSERVATIONAL STUDY (THE POSITIVE STUDY)

|                               |                                                                                                                                                                                                                                                                                                                                                                                                                                                                                                                                                                                                                                                                                                                                                                                                                                                                                                                                                                                                                                                                                                                                                                                                                                                                                                                                                                                                                                                                             |
|-------------------------------|-----------------------------------------------------------------------------------------------------------------------------------------------------------------------------------------------------------------------------------------------------------------------------------------------------------------------------------------------------------------------------------------------------------------------------------------------------------------------------------------------------------------------------------------------------------------------------------------------------------------------------------------------------------------------------------------------------------------------------------------------------------------------------------------------------------------------------------------------------------------------------------------------------------------------------------------------------------------------------------------------------------------------------------------------------------------------------------------------------------------------------------------------------------------------------------------------------------------------------------------------------------------------------------------------------------------------------------------------------------------------------------------------------------------------------------------------------------------------------|
| Journal:                      | <i>BMJ Open</i>                                                                                                                                                                                                                                                                                                                                                                                                                                                                                                                                                                                                                                                                                                                                                                                                                                                                                                                                                                                                                                                                                                                                                                                                                                                                                                                                                                                                                                                             |
| Manuscript ID                 | bmjopen-2021-060536                                                                                                                                                                                                                                                                                                                                                                                                                                                                                                                                                                                                                                                                                                                                                                                                                                                                                                                                                                                                                                                                                                                                                                                                                                                                                                                                                                                                                                                         |
| Article Type:                 | Protocol                                                                                                                                                                                                                                                                                                                                                                                                                                                                                                                                                                                                                                                                                                                                                                                                                                                                                                                                                                                                                                                                                                                                                                                                                                                                                                                                                                                                                                                                    |
| Date Submitted by the Author: | 17-Jan-2022                                                                                                                                                                                                                                                                                                                                                                                                                                                                                                                                                                                                                                                                                                                                                                                                                                                                                                                                                                                                                                                                                                                                                                                                                                                                                                                                                                                                                                                                 |
| Complete List of Authors:     | <p>Augustin, Matthias; University Medical Center Hamburg-Eppendorf, Institute for Health Services Research in Dermatology and Nursing (IVDP)</p> <p>Sommer, Rachel; University Medical Center Hamburg-Eppendorf, Institute for Health Services Research in Dermatology and Nursing (IVDP)</p> <p>Dauden, E.; La Princesa University Hospital, Instituto de Investigación Sanitaria La Princesa (IIS-IP)</p> <p>Laws, Philip; Leeds Teaching Hospitals NHS Trust</p> <p>de Jong , Elke; Radboud University Medical Center (Radboudumc), Department of Dermatology</p> <p>Fabbrocini, Gabriella ; University of Naples Federico II, Section of Dermatology, Department of Clinical Medicine and Surgery</p> <p>Naldi, Luigi; San Bortolo Hospital, Division of Dermatology</p> <p>Navarini, Alexander ; University Hospital Basel, Department of Dermatology</p> <p>Lambert, Jo; Ghent University Hospital, Department of Dermatology</p> <p>Reguai, Ziad; Polyclinic Courlancy, Department of Dermatology</p> <p>Gerdes, Sascha; University Medical Center Schleswig-Holstein, Campus Kiel, Center for Inflammatory Skin Diseases, Department of Dermatology, Venereology and Allergology</p> <p>Massana, Eric; Almirall GMA</p> <p>Obis, Teresa; IQVIA, Department of Patient-Centered Solutions</p> <p>Kasujee, Ismail; Almirall GMA</p> <p>Mrowietz, Ulrich; University Medical Center Schleswig-Holstein, Campus Kiel, , Psoriasis-Center, Department of Dermatology</p> |
| Keywords:                     | Psoriasis < DERMATOLOGY, THERAPEUTICS, EPIDEMIOLOGY                                                                                                                                                                                                                                                                                                                                                                                                                                                                                                                                                                                                                                                                                                                                                                                                                                                                                                                                                                                                                                                                                                                                                                                                                                                                                                                                                                                                                         |

SCHOLARONE™  
Manuscripts

1  
2  
3 **PATIENT-REPORTED WELL-BEING IN VALUE-BASED CARE USING**  
4  
5 **TILDRAKIZUMAB IN A REAL-WORLD SETTING: PROTOCOL OF A MULTI-**  
6  
7 **NATIONAL, PHASE IV, 1-COHORT PROSPECTIVE OBSERVATIONAL STUDY**  
8  
9 **(THE POSITIVE STUDY)**  
10  
11

12 Matthias Augustin<sup>1</sup>, Rachel Sommer<sup>1</sup>, Esteban Daudén<sup>2</sup>, Phillip Laws<sup>3</sup>, Elke MGJ de Jong<sup>4</sup>,  
13  
14 Gabriella Fabbrocini<sup>5</sup>, Luigi Naldi<sup>6</sup>, Alexander Navarini<sup>7</sup>, Jo Lambert<sup>8</sup>, Ziad Reguiai<sup>9</sup>, Sascha  
15  
16 Gerdes<sup>10</sup>, Eric Massana<sup>11</sup>, Teresa Obis<sup>12</sup>, Ismail Kasujee<sup>11</sup>, and Ulrich Mrowietz<sup>13</sup>  
17  
18

19 <sup>1</sup> *Institute for Health Services Research in Dermatology and Nursing (IVDP), University*  
20 *Medical Center Hamburg-Eppendorf (UKE), Hamburg, Germany.*

21 <sup>2</sup> *La Princesa University Hospital, Instituto de Investigación Sanitaria La Princesa (IIS-IP),*  
22 *Madrid, Spain.*

23 <sup>3</sup> *Leeds Teaching Hospitals NHS Trust, Leeds, the United Kingdom.*

24 <sup>4</sup> *Department of Dermatology, Radboud University Medical Center (Radboudumc), Nijmegen,*  
25 *The Netherlands.*

26 <sup>5</sup> *Section of Dermatology, Department of Clinical Medicine and Surgery, University of Naples*  
27 *Federico II, Naples, Italy.*

28 <sup>6</sup> *Division of Dermatology, San Bortolo Hospital, Vicenza, Italy.*

29 <sup>7</sup> *Department of Dermatology, University Hospital Basel, Basel, Switzerland.*

30 <sup>8</sup> *Department of Dermatology, Ghent University Hospital, Ghent, Belgium.*

31 <sup>9</sup> *Dermatology Department, Polyclinic Courlancy, Reims, France.*

32 <sup>10</sup> *Center for Inflammatory Skin Diseases, Department of Dermatology, Venereology and*  
33 *Allergology, University Medical Center Schleswig-Holstein, Campus Kiel, Kiel, Germany.*

34 <sup>11</sup> *Almirall GMA, Barcelona, Spain.*

35 <sup>12</sup> *Department of Patient-Centered Solutions, IQVIA, Barcelona, Spain.*

36 <sup>13</sup> *Psoriasis-Center, Department of Dermatology, University Medical Center Schleswig-*  
37 *Holstein, Campus Kiel, Kiel, Germany.*

38  
39  
40  
41 **Corresponding author**

42  
43 Prof. Dr. med. Matthias Augustin

44  
45 Director, Institute for Health Services Research in Dermatology and Nursing (IVDP),

46  
47 University Medical Center Hamburg-Eppendorf (UKE)

48  
49 Martinistr. 52, 20246 Hamburg, Germany

50  
51 E-mail: [m.augustin@uke.de](mailto:m.augustin@uke.de)

52  
53  
54  
55 **Word count:** 3,547

## ABSTRACT

**Introduction:** Psoriasis is a chronic inflammatory skin disease that negatively impacts the quality of life of patients and their families. However, the most commonly used decision-making tools in psoriasis, Psoriasis Area and Severity Index (PASI), Physician Global Assessment (PGA) and Dermatology Life Quality Index (DLQI), do not fully capture the impact of psoriasis on patients' lives. In contrast, the well-established 5-item World Health Organization Well-being Index (WHO-5) assesses the subjective psychological well-being of patients. Moreover, while drug innovations became available for psoriasis, data on the impact of these therapies on patients' lives and their closest environment (family, physicians) is limited. This study will assess the effect of tildrakizumab, an interleukin-23p19 inhibitor, on the overall well-being of patients with moderate-to-severe psoriasis. Moreover, the long-term benefit of tildrakizumab on physicians' satisfaction and psoriasis patients' partners' lives will be evaluated.

**Methods and analysis:** This non-interventional, prospective, observational, real-world evidence study will involve multiple sites in Europe and approximately 500 adults with moderate-to-severe psoriasis treated with tildrakizumab. Each patient will be followed for 24 months. The primary endpoint is well-being measured by the WHO-5 questionnaire. Key secondary endpoints include Physician's Satisfaction and partner's quality of life (FamilyPso). Other endpoints will evaluate skin-generic quality of life (DLQI-R), Treatment Satisfaction Questionnaire for Medication (TSQM-9), Treatment-related Patient Benefit Index "Standard", 10 items (PBI-S-10), and work productivity and activity impairment (WPAI). Statistical analyses will be based on observed cases. Multiple imputation will be performed as a sensitivity analysis, and adverse events will be reported.

**Ethics and dissemination:** The study will be conducted according to the protocol, which received ethics committee approval and applicable regulatory requirements of each

1  
2  
3 participating country. The results will be disseminated through scientific publications and  
4  
5 congress presentations.  
6  
7  
8  
9

10 **Registration details:** NCT04823247.  
11  
12  
13  
14  
15  
16  
17  
18  
19  
20  
21  
22  
23  
24  
25  
26  
27  
28  
29  
30  
31  
32  
33  
34  
35  
36  
37  
38  
39  
40  
41  
42  
43  
44  
45  
46  
47  
48  
49  
50  
51  
52  
53  
54  
55  
56  
57  
58  
59  
60

For peer review only

### STRENGTHS AND LIMITATIONS OF THIS STUDY

- First clinical study in dermatology using the patient-reported well-being as the primary endpoint in accordance with the holistic definition of health by the World Health Organization (WHO)
- Innovative secondary endpoints such as physician's well-being, patient-defined benefit assessment and the impact of psoriasis on the patients' partner following a people-centred approach claimed by the WHO.
- Relevant sample size from different European countries.
- Patient's bias on self-perception due to the inclusion in a clinical study.
- Potential drop-outs or losses to follow-up due to the long observational period.

## INTRODUCTION

Psoriasis is an immune-mediated, chronic relapsing inflammatory condition characterised by abnormal differentiation and proliferation of the epidermis affecting skin, nails, and joints [1]. The severity of psoriasis is profound as it includes physical and psychological components [2]. Increasing evidence suggest that psoriasis considerably affects the overall well-being of patients and their families [3], as well as their personal, social, and occupational life [4], often resulting in psychological distress and depression [5–7]. A Europe-wide survey examining quality of life reported that almost 77% of patients believed psoriasis negatively affected normal daily activities and well-being [8]. Moreover, a more recent survey showed that psoriasis patients generally report poor quality of life and physicians are often also not satisfied with their patients' treatment [9]. These studies highlight the need for a well-being evaluation strategy besides the available psoriasis severity scoring assessments [10]. Patient-reported outcomes (PROs) are being used with increasing frequency in clinical trials and provide valuable information on how psoriasis affects physical, social, and psychological aspects of patients' lives. However, the most commonly used decision-making tools in psoriasis, the clinician-reported Psoriasis Area Severity Index (PASI), Physician Global Assessment (PGA) and the patient-reported Dermatology Life Quality Index (DLQI), do not take into account the entire patient disease perspective, leading to misaligned perception between physicians and patients [11]. While the PASI and PGA track changes in psoriasis severity from a clinician's perspective [12,13], the skin-generic DLQI has been used to evaluate psoriasis symptoms and their impact on quality of life [14]. However, the use of the DLQI has been associated with several measurement problems related to age, gender difference, inadequate power to differentiate patients with mild illness, and underestimating patient's emotional status [15,16]. Furthermore, being a sum score and permitting to rate "not relevant" in 8 out of 10 items, DLQI has been shown to provide marked bias and to underestimate the burden of very severely affected

1  
2  
3 patients[16]. Moreover, a systematic review on skin conditions has highlighted the critical need  
4  
5 for psychiatric assessments in addition to the DLQI score for a full assessment of patient  
6  
7  
8  
9  
10  
11  
12  
13  
14  
15  
16  
17  
18  
19  
20  
21  
22  
23  
24  
25  
26  
27  
28  
29  
30  
31  
32  
33  
34  
35  
36  
37  
38  
39  
40  
41  
42  
43  
44  
45  
46  
47  
48  
49  
50  
51  
52  
53  
54  
55  
56  
57  
58  
59  
60

patients[16]. Moreover, a systematic review on skin conditions has highlighted the critical need for psychiatric assessments in addition to the DLQI score for a full assessment of patient psychological well-being [17,18].

### **Unmet needs at the time of biologics**

Studies have indicated that a patient-oriented evaluation is critical for overall symptom assessment as physicians' indicators alone cannot capture the disease burden of psoriasis [19–21]. The advent of biologics as monotherapy or in combination with other topical or systemic medications significantly changed the treatment approach for psoriasis representing an advancement over topical treatments or traditional immunosuppressive therapies [22–24]. Biologics target specific components of the immune system and have shown a high benefit-to-risk ratio, high efficacy and acceptable safety profiles [25]. Further, more advanced biologics have been shown to be more cost-effective than first-generation drugs [26,27]. Monoclonal antibodies, selective for the interleukin (IL)-23p19 subunit inhibition, represent a new standard of treatment currently available for the long-term management of psoriasis [28]. Among these, tildrakizumab has demonstrated long-term efficacy and safety in the pivotal phase 3 studies (reSURFACE 1 and 2) comparing tildrakizumab versus placebo or etanercept for moderate-to-severe psoriasis [29]. However, while biologics are becoming a more important treatment option for individuals with psoriasis, current therapy goals and PROs in dermatology do not fully capture the impact of this therapy on patients' and physicians' well-being [30,31]. Moreover, although several studies have shown that psoriasis significantly affects mental health [32,33], standard severity scores have been found to be very weakly associated with the overall well-being of these patients [34,35]. In practice, there is high need to translate patient burden to patients needs and then derive patient goals conjointly with the patient. Thus, understanding the needs and expectations of patients beyond measuring burden constitutes a fundamental part



1  
2  
3 of treatment in psoriasis [36]. This is particularly important in sensitive conditions such as nail  
4 and anogenital affections [37–39].  
5  
6  
7

### 8 **Well-being in psoriasis: clinical goals**

9  
10 Insights on the well-being of the patients are based on the patient's view of their condition, and  
11 this concept is increasingly being embraced as a more comprehensive outcome in line with a  
12 holistic view and people-centred perspective, but still undervalued in traditional PROs. Well-  
13 being is a holistic multifaceted concept that in a study context describes “to what extent patients  
14 will get their healthy lives back”, where mental, physical, and social functioning are  
15 interdependent [40]. According to the World Health Organisation (WHO), the ultimate goal of  
16 therapy in chronic diseases such as psoriasis is achieving well-being [41]. Nevertheless, well-  
17 being has been rarely measured in dermatology so far. A recent study concluded that the DLQI  
18 primarily measures physical impairment associated with negative emotions and, thus, provides  
19 only a limited evaluation of well-being [42]. Thus, assessing well-being or specific dimensions  
20 of well-being can contribute to a holistic evaluation of patients' health in accordance with the  
21 WHO's holistic definition.  
22  
23  
24  
25  
26  
27  
28  
29  
30  
31  
32  
33  
34  
35  
36  
37  
38

### 39 **Innovative endpoints in this study**

40  
41 To assess patient well-being this study will apply the 5-item WHO Well-being Index (WHO-  
42 5), a widely used questionnaire assessing psychological health-related well-being in a variety  
43 of chronic diseases such as diabetes, cardiovascular disease, cancer, and depression [43]. For  
44 the first time, WHO-5 will be used as a primary endpoint in patients with psoriasis to investigate  
45 the improvements that tildrakizumab can achieve on patients' well-being in a real-world setting.  
46 Moreover, building a positive cross-talk environment between healthcare professionals and  
47 patients is critical. A meta-analysis study including 400 publications reported a higher quality  
48 of life and overall improved treatment outcome when patients had higher trust in their physician  
49  
50  
51  
52  
53  
54  
55  
56  
57  
58  
59  
60

1  
2  
3 [21], underlining how physician's well-being is essential as it can improve patients' satisfaction  
4 and interpersonal aspects of care [22]. Patient's behaviour, in turn, can affect physicians' well-  
5 being, including unrealistic expectations, aggression, or by developing family-like  
6 relationships, resulting in emotional detachment and burnout [23]. As there is no complete  
7 correlation between patient- and physician-reported outcome measures, both PROs and  
8 physician-reported scores should be considered when assessing treatment outcomes [24]. In this  
9 study, the 'Physician's satisfaction' score will be exploited as an innovative tool to investigate  
10 the impact of the psoriasis treatment process on physicians' wellbeing. Furthermore,  
11 information on the impact of psoriasis on patients' families, particularly partners, is also  
12 lacking, even though the impact of skin disease on family members or partners of patients  
13 should be measured while evaluating the burden of psoriasis [3]. Thus, this study will include  
14 the questionnaire FamilyPso [44], enabling physicians to better understand the impact of  
15 psoriasis as a lifelong chronic disease on partners. This study will provide novel insights into  
16 the dimensions of patients' perspectives and their overall state of well-being using a holistic  
17 patient-partner and physicians-centred approach. The current study is designed to investigate  
18 patient-reported well-being using tildrakizumab in a real-world setting, as well as the impact  
19 on their closing environment, including partners and physicians, to provide a more  
20 comprehensive overview of people-centred healthcare and their overall state of well-being.  
21  
22  
23  
24  
25  
26  
27  
28  
29  
30  
31  
32  
33  
34  
35  
36  
37  
38  
39  
40  
41  
42  
43  
44  
45  
46  
47  
48  
49  
50  
51  
52  
53  
54  
55  
56  
57  
58  
59  
60

## METHODS AND ANALYSIS

The primary objective is to assess the effect of tildrakizumab on the overall well-being in patients with moderate-to-severe psoriasis using the WHO-5 questionnaire. Secondary objectives include: to evaluate the long-term benefit of tildrakizumab on physician's satisfaction (Physician's Satisfaction Questionnaire) and the impact of psoriasis on patients' partners (FamilyPso questionnaire); to assess the long-term benefit of tildrakizumab reported by patients in terms of skin-generic quality of life (DLQI-R), treatment satisfaction (TSQM-9) and treatment-related benefits (PBI-S-10), work impairment due to psoriasis (WPAI:PSO) and extent of the skin manifestations using the "Heat map" in a subgroup of patients; to correlate the change of WHO-5 with patients' health-related quality of life (HRQoL) and patients' treatment benefits; to assess the control of skin manifestations (absolute PASI) and its impact on patients, physician's satisfaction and on partners of patients; to describe the socio-demographic and clinical profile of the patients being treated with tildrakizumab, according to the routine clinical practice; and to assess the safety and tolerability of tildrakizumab in a real-world setting. Exploratory objectives are to assess the impact of tildrakizumab on PGA of the skin manifestations and to assess the concordance between patients and physician's satisfaction regarding response to the treatment with tildrakizumab.

### Study design

This is an ethics-approved, multi-national, Phase IV, 1-cohort prospective observational study planned to be conducted in multiple sites in several countries (e.g., Austria, Belgium, France, Germany, Italy, Spain, Switzerland, The Netherlands, and United Kingdom [UK]) to assess patient-reported well-being using tildrakizumab in a live setting. The study design is summarised in **Figure 1**.

### Study population

The study population will comprise a minimum of 338 patients with moderate-to-severe plaque psoriasis who need systemic biologic therapy and qualify for treatment with an IL-23p19 inhibitor in real-world clinical practice. Consecutive patients satisfying all the inclusion criteria and none of the exclusion criteria shown in **Table 1** to be eligible for participation will be offered participation. Recruitment will be competitive across all countries participating in the study (i.e., no fixed number of patients per country).

**Table 1.** Eligibility criteria

| <b>Inclusion criteria</b> |                                                                                                                                                                                                         |
|---------------------------|---------------------------------------------------------------------------------------------------------------------------------------------------------------------------------------------------------|
| 1                         | Patient with diagnosis of moderate-to-severe chronic plaque psoriasis documented in the medical chart.                                                                                                  |
| 2                         | Patient who needs systemic biologic therapy and qualifies for treatment with an IL-23p19 inhibitor. Tildrakizumab must be the anti-IL-23p19 selected therapy before including the patient in the study. |
| 3                         | Patient aged 18 years or older at the time of patient recruitment.                                                                                                                                      |
| 4                         | Patient who has provided written informed consent (if required by country regulations).                                                                                                                 |
| <b>Exclusion criteria</b> |                                                                                                                                                                                                         |
| 1                         | Patients unable to comply with the requirements of the study or who, in the opinion of the study physician, should not participate in the study.                                                        |
| 2                         | Patients included in a clinical trial.                                                                                                                                                                  |

IL, interleukin.

## Endpoints

Study endpoints cover outcomes reported by patients, their partners, and physicians. The primary endpoint is to assess the overall health-related well-being (evaluated through WHO-5 questionnaire) in patients treated with tildrakizumab according to the marketing authorization and routine clinical practice at the long-term. The secondary endpoints are: physicians' satisfaction evaluation through a composite survey with 16 items (10 generic professional quality of life items and 6 items related to the biological treatment); partner well-being evaluation through the FamilyPso questionnaire; patient's perspective on tildrakizumab long-term benefit evaluation through the (i) skin-generic quality of life questionnaire (DLQI-R), (ii) Treatment Satisfaction Questionnaire for Medication (TSQM-9), (iii) Treatment-related Patient

Benefit Index “Standard”, 10 items (PBI-S-10), (iv) Work Productivity and Activity Impairment Questionnaire: Psoriasis (WPAI:PSO), (v) skin manifestations distribution (patient’s grid) and (vi) the Numeric Rating Scale (NRS) for itch, pain, joint pain, and fatigue assessments; disease control evaluated through the absolute PASI; description of the sociodemographic (age, gender, educational and working status, etc.) and clinical (location of moderate-to-severe psoriasis, comorbid disease, laboratory tests, etc.) characteristics; adverse events (AE) reported during the use of tildrakizumab. The exploratory endpoints are: the control of the skin manifestation evaluation through the PGA; Patient’s and physician’s opinion about tildrakizumab treatment in relation to the therapeutic objectives’ evaluation through the Patient’s and physician’s questionnaire (**Table 2**).

**Table 2.** Endpoints of the study

|                              | <b>Patient reported outcomes</b>                                                                                                                                                                                | <b>Partners reported outcomes</b> | <b>Physician reported outcomes</b>            | <b>Patient and physician reported outcomes</b>                                           |
|------------------------------|-----------------------------------------------------------------------------------------------------------------------------------------------------------------------------------------------------------------|-----------------------------------|-----------------------------------------------|------------------------------------------------------------------------------------------|
| <b>Primary endpoint</b>      | - WHO-5                                                                                                                                                                                                         |                                   |                                               |                                                                                          |
| <b>Secondary endpoint</b>    | - DLQI-R<br>- TSQM-9<br>- PBI-S-10<br>- WPAI: PSO<br>- Patient grid<br>- NRS (itch, pain, joint pain, fatigue assessments)<br>- Sociodemographic and clinical characteristics<br>- AEs during tildrakizumab use | - FamilyPso                       | - Physicians’ satisfaction<br>- Absolute PASI |                                                                                          |
| <b>Exploratory endpoints</b> |                                                                                                                                                                                                                 |                                   | - PGA                                         | - Patient’s and physician’s questionnaire<br>- Patient’s and physician’s satisfaction of |

|  |  |  |  |                         |
|--|--|--|--|-------------------------|
|  |  |  |  | being part of the study |
|--|--|--|--|-------------------------|

AE, adverse event; DLQI-R, Dermatology Life Quality Index-Revised; NRS, Numeric Rating Scale; PASI, Psoriasis Area Severity Index; PBI-S-10, Patient Benefit Index “Standard”, 10 items short form; PGA, Physician Global Assessment; TSQM-9, Treatment Satisfaction Questionnaire for Medication ;WHO-5, World Health Organization-Five Well-being Index; WPAI:PSO, Work Productivity and Activity Impairment Questionnaire: Psoriasis.

### Data sources and collection

All data will be collected prospectively from the medical charts and entered directly into the electronic data capture system. The study will include both variables extracted from the medical chart and obtained directly from the patients. No visits or examinations, laboratory tests, or procedures are mandated or recommended as part of this study. The data collection schedule is shown in **Table 3**.

**Table 3.** Data collection schedule

|                                                                                    | Baseline visit | Follow-up visit (at 16 and 28 weeks, 12 and 18 months after baseline visit) | Final visit (24 months from baseline) | Early termination visit |
|------------------------------------------------------------------------------------|----------------|-----------------------------------------------------------------------------|---------------------------------------|-------------------------|
| Patient characteristics and demographics (including date of ICF signature)         | X              |                                                                             | X <sup>a</sup>                        | X <sup>a</sup>          |
| Disease characteristics (diagnosis date, type of psoriasis, severity of psoriasis) | X              |                                                                             |                                       |                         |
| Laboratory test (if it is available)                                               | X              | X                                                                           | X                                     | X                       |
| Comorbidities                                                                      | X              | X                                                                           | X                                     | X                       |
| Concomitant medication                                                             | X              | X                                                                           | X                                     | X                       |
| Drug therapy history                                                               | X              |                                                                             |                                       |                         |
| Tildrakizumab drug therapy (dose)                                                  | X              | X                                                                           | X                                     | X                       |
| PASI                                                                               | X              | X                                                                           | X                                     | X                       |
| Heat map/patient’s grid (subgroup of patients)                                     | X              | X                                                                           | X                                     | X                       |
| Adverse Event reporting                                                            | X              | X                                                                           | X                                     | X                       |

|                                                                                         | Baseline visit | Follow-up visit (at 16 and 28 weeks, 12 and 18 months after baseline visit) | Final visit (24 months from baseline) | Early termination visit |
|-----------------------------------------------------------------------------------------|----------------|-----------------------------------------------------------------------------|---------------------------------------|-------------------------|
| <b>Questionnaires</b>                                                                   |                |                                                                             |                                       |                         |
| WHO-5                                                                                   | X              | X                                                                           | X                                     | X                       |
| DLQI-R                                                                                  | X              | X                                                                           | X                                     | X                       |
| PBI-S-10                                                                                | X              | X                                                                           | X                                     | X                       |
| TSQM-9                                                                                  |                | X                                                                           | X                                     | X                       |
| WPAI:PSO                                                                                | X              | X                                                                           | X                                     | X                       |
| FamilyPso                                                                               | X              | X                                                                           | X                                     | X                       |
| NRS (itch, pain, joint pain, fatigue)                                                   | X              | X                                                                           | X                                     | X                       |
| Patient's and Physician's satisfaction of being part in the study (open field question) | X              |                                                                             | X                                     | X                       |
| PGA                                                                                     | X              | X                                                                           | X                                     | X                       |
| Physician's satisfaction                                                                | X              | X                                                                           | X                                     | X                       |
| Patient's and physician's questionnaire                                                 |                | X                                                                           | X                                     | X                       |

DLQI-R, Dermatology Life Quality Index-Revised; ICF, informed consent form; NRS, Numeric Rating Scale; PASI, Psoriasis Area Severity Index; PBI-S-10, Patient Benefit Index "Standard", 10 items short form; PGA, Physician Global Assessment; TSQM-9, Treatment Satisfaction Questionnaire for Medication ;WHO-5, World Health Organization-Five Well-being Index; WPAI:PSO, Work Productivity and Activity Impairment Questionnaire: Psoriasis; a, Undefined.

## Questionnaires

All the questionnaires included in the study have validated translations according to international guidelines from the original language to the official languages in the participating countries.

### Primary endpoint:

1. The 5-item World Health Organization Well-being Index (WHO-5): The WHO-5 is a generic global rating scale measuring subjective well-being containing positive statements. The respondent is asked to rate how well each of the 5 items applies to him or her when considering the last 14 days. Each of the 5 items is scored from 5 (all of the time) to 0 (none of the time). The raw score therefore theoretically ranges from 0

(absence of well-being) to 25 (maximal well-being). To standardize the score on a scale from 0 (absent) to 100 (maximal), it is recommended to multiply the raw score by 4 [43].

### **Secondary endpoints:**

2. Dermatology Life Quality Index-Relevant (DLQI-R): The DLQI-R is a recently developed scoring that adjusts the total score of the questionnaire for the number of 'not relevant' responses indicated by a patient. It is a self-administrated questionnaire validated as a dermatology-specific quality of life instrument. It includes 10 items to assess patient's HRQoL during the previous week on a 4-point scale, indicating 'not at all', 'a little', 'a lot' and 'very much', respectively. For each patient, the DLQI-R score is estimated as a sum score of the original DLQI score replacing items rated "not relevant" by the mean of the other items [45].
3. Patient Benefit Index "Standard", 10-item short form (PBI-S-10: 10 items describing treatment goals of patients with skin diseases. Before treatment, these goals are rated on a 5-point Likert-scale (0="not at all", 4="very") according to their perceived relevance (PNQ). Alternatively, patients can state that a goal "does not apply" to them. In the course of treatment, patients are asked to express the achievement of these 10 treatment goals (treatment benefit) on the same 5-point Likert-scale (PBQ), again with the opportunity to state that the goal did not apply [46]. An overall index of patient benefits (PBI) is calculated by adding the single weighted benefits to a sum score reaching from 0=no patient benefit to 4=very strong patient benefit.
4. Treatment Satisfaction Questionnaire for Medication (TSQM-9): It is a self-administrated questionnaire that measures patients' drug therapy satisfaction considering the last two or three weeks or since the last time the patient took the medication. It consists of 9 statements distributed in 3 domains: efficacy (3 items),



1  
2  
3 convenience (3 items) and global satisfaction (3 items). Responses are measured on a  
4  
5 Likert scale of 5 or 7 points [47,48].  
6

- 7  
8 5. Work Productivity and Activity Impairment Questionnaire: Psoriasis (WPAI: PSO): It  
9  
10 is a self-administrated questionnaire that measures the impact on the work productivity  
11  
12 in patients with psoriasis considering the last seven days. The questionnaire contains 6  
13  
14 items with dichotomous response options [49].  
15
- 16  
17 6. Numeric Rating Scale (NRS) (itch, pain, joint pain, fatigue): It is a self-administrated  
18  
19 questionnaire to assess patients' itch severity, pain, joint pain and fatigue. The  
20  
21 questionnaire has a single-item that describes the worst level of itching, joint pain and  
22  
23 fatigue, respectively, due to psoriasis in the past 24h [50].  
24
- 25  
26 7. FamilyPso: It is a self-administrated questionnaire to assess the burden on partners of  
27  
28 patients with psoriasis. The questionnaire has 15 items divided in 5 factors: 1) Perceived  
29  
30 strain by social reactions to the partner's psoriasis; 2) Strain caused by cleaning; 3)  
31  
32 Acute emotional strain attributed directly to the psoriasis; 4) Restrictions of social life;  
33  
34 5) General emotional strain. The items are scaled in a 5-point Likert format: 0='not  
35  
36 true', 1='somewhat true', 2='moderately true', 3='quite true', 4='very true', with the  
37  
38 supplementary option 'does not apply to me' [44].  
39
- 40  
41  
42 8. Patient's and physician's questionnaire: Survey of 10 questions elaborated for this  
43  
44 project with the objective to assess the opinion of physicians and patients about  
45  
46 tildrakizumab treatment in relation to the therapeutic objectives. The physician will  
47  
48 respond according to his/her assessment in relation to the response to tildrakizumab  
49  
50 treatment of each patient. Each item is scaled in a 5-points Likert format: 'strongly  
51  
52 agree', 'agree', 'uncertain', 'disagree' and 'strongly disagree'.  
53
- 54  
55  
56 9. PASI: measure of psoriasis severity average to quantify psoriasis grade [51], combining  
57  
58 an assessment of each psoriasis lesion graded on a 0-4 scale (0=none and 4=maximum)  
59  
60

1  
2  
3 based on three parameters of the lesions including, erythema (redness), induration  
4 (thickness), desquamation (scaliness) and on a weighted evaluation of the affected area  
5  
6 (from 0=affecting 0% to 6=affecting 100%), dividing the body into four sections: head  
7  
8 (10% of person's skin), trunk (30%), upper extremities (20%) and lower extremities  
9  
10 (40%). Each area is scored by itself.  
11  
12  
13

14  
15 10. Physician Global Assessment (PGA): A 5-point ordinal scale used to assess the severity  
16  
17 of disease over the body including global, scalp, palmoplantar and nails. The scale  
18  
19 ranges from 0 to 4 for global, scalp and palmoplantar assessment [52]:  
20  
21

22 0= clear: no signs of psoriasis

23  
24 1= almost clear: only minimal plaque elevation, scaling, and/or erythema

25  
26 2= mild: slight plaque elevation, scaling, and/or erythema

27  
28 3= moderate: moderate plaque elevation, scaling, and/or erythema

29  
30 4= severe: very marked plaque elevation, scaling, and/or erythema  
31  
32

33 For nails assessment, the scale ranges from 0 to 4:

34  
35 0= none: normal nail appearance

36  
37 1= mild: pitting and/or oil drops; mild disfigurement

38  
39 2= moderate: prominent visible pitting and/or oil drops, distal onycholysis  
40  
41 with/without hyperkeratosis; moderate disfigurement  
42  
43

44 3= severe: pronounced nail changes including pitting, oil drops, distal  
45  
46 onycholysis with/without hyperkeratosis, onychodystrophy; substantial  
47  
48 disfigurement  
49  
50

51 4= very severe: severe distal onycholysis with/without hyperkeratosis and/or  
52  
53 severe onychodystrophy; prominent disfigurement  
54  
55

56 11. Physician's satisfaction: A composite survey with 16 items, 10 of them are generic  
57  
58 items and correspond to the compassion subscale of the ProQoL questionnaire [53]; and  
59  
60

1  
2  
3 6 items were specifically created for this study regarding biological treatment. There are  
4  
5 5-point scales that reflect how frequently the physician experienced this thing in the last  
6  
7 30 days.  
8  
9

10 12. Patient's and physician's satisfaction of being part of the study: open question to assess  
11  
12 the satisfaction that the participation on a clinical study may provide to the patients and  
13  
14 physicians.  
15  
16

### 17 **Sample size calculation**

18  
19  
20 A total sample size of 338 patients with baseline WHO-5 score  $\leq 50$  will provide a 95% power  
21  
22 to detect a difference of 10 points [43] in the absolute change from baseline in the WHO-5 total  
23  
24 score at week 24, assuming 50.5 as the standard deviation of the difference. This sample size  
25  
26 of 338 patients produces a two-sided 95% confidence interval with a precision of  $\pm 5.4$  points.  
27  
28 A conservative estimation assumes that 75% of the psoriatic population may have a baseline  
29  
30 WHO-5 score  $\leq 50$  [54]. Therefore, around 450 patients will have to be included in the study to  
31  
32 ensure the 338 patients previously described. Also considering a 10% drop out rate, the final  
33  
34 number of patients to be included will be approximately 500.  
35  
36  
37  
38

### 39 **Data analyses and reporting**

40  
41 All data analyses will be performed using SAS<sup>®</sup> version 9.2 or higher (SAS Institute, Cary, NC,  
42  
43 USA). Descriptive analyses will be performed. Statistical analyses will be based on observed  
44  
45 cases. Multiple imputation will be performed as a sensitivity analysis. All AE verbatim terms  
46  
47 will be recorded and coded using the Medical Dictionary for Regulatory Activities (MedDRA).  
48  
49 Medication will be coded using WHO Drug Dictionary. Final analyses will be performed once  
50  
51 the data from all patients have been collected in the database, cleaned, and database lock has  
52  
53 occurred. Analyses will be performed overall and per country.  
54  
55  
56  
57

### 58 **Patient and public involvement statement**

1  
2  
3 Patients or the public were not involved in the design of the study, and will not be involved in  
4  
5 the conduct, reporting, or dissemination plans of this research.  
6  
7  
8  
9  
10  
11  
12  
13  
14  
15  
16  
17  
18  
19  
20  
21  
22  
23  
24  
25  
26  
27  
28  
29  
30  
31  
32  
33  
34  
35  
36  
37  
38  
39  
40  
41  
42  
43  
44  
45  
46  
47  
48  
49  
50  
51  
52  
53  
54  
55  
56  
57  
58  
59  
60

For peer review only

## ETHICS AND DISSEMINATION

This non-interventional study will be conducted in compliance with the protocol, all applicable regulatory requirements of the countries where the study is being conducted and the ethical principles of the latest version of the Declaration of Helsinki that are consistent with Good Pharmacoepidemiology Practices (GPP). Data protection and privacy regulations will be strictly observed in capturing, forwarding, processing, and storing patient data according to the Directive 95/46/EC on the protection of individuals and in compliance with the Regulation (EU) 2016/679 of the European Parliament and of the Council of 27 April 2016 on the protection of natural persons with regard to the processing of personal data and on the free movement of such data, and repealing Directive 95/46/EC (General Data Protection Regulation). The results of the POSITIVE study will be disseminated through one or more scientific manuscripts and may also be presented at medical congresses.

## DISCUSSION

The lack of patient-oriented outcome measures for assessing the overall well-being of patients with psoriasis is becoming a concern in dermatology clinical practice and research. Psoriasis heavily affects the physical, psychological and social well-being of patients and that of their family members and partners, thus, beside clinical assessments, the full impact of psoriasis treatment on the patient and people around should be recognised. To our knowledge, the POSITIVE study is the first study to apply the WHO-5 as a primary endpoint to estimate the improvements on patients' well-being treated with tildrakizumab in a real-world setting. This study will measure the well-being of patients, their partners and of physicians, for a better understanding of the impact of psoriasis as a chronic disease on patients' and their close environment. The results of this study could potentially be added to the available psoriasis evaluation methods, and provide dermatologists with new tools to improve their own and patient's well-being enhancing patient-clinician relationships. The need to provide results from the POSITIVE study becomes essential given the WHO claim for people-centred healthcare and patient commitment. The POSITIVE study will significantly promote patients' involvement and awareness as recommended by the WHO global report on psoriasis [5], as the most common root for patient dissatisfaction is being poorly engaged in the treatment decision-making process. Limitations of the study will include potential bias and missing information or possible drop-outs or lost to follow-up in the last follow-up visits of the study because of the long observational period. Moreover, patients included in this study will have to be preselected to initiate tildrakizumab therapy before patient inclusion in the study. Finally, a limitation could be represented by patient-related bias on self-perception due to the inclusion in a clinical study.

1  
2  
3 In summary, this prospective observation study constitutes an innovative people-centric  
4 approach to investigate how intervention with tildrakizumab may improve the wellbeing of  
5  
6 patients, their families, and healthcare professionals.  
7  
8  
9  
10  
11  
12  
13  
14  
15  
16  
17  
18  
19  
20  
21  
22  
23  
24  
25  
26  
27  
28  
29  
30  
31  
32  
33  
34  
35  
36  
37  
38  
39  
40  
41  
42  
43  
44  
45  
46  
47  
48  
49  
50  
51  
52  
53  
54  
55  
56  
57  
58  
59  
60

For peer review only

## ACKNOWLEDGEMENTS

Editorial assistance and writing support were provided by Paula Casajust, MSc and Stefania Ippati, PhD of TFS HealthScience.

For peer review only



## CONTRIBUTORSHIP STATEMENT

**All authors were involved in conception and study design. All authors provided edits, critiqued the manuscript for intellectual content, and approved the final manuscript.**

## COMPETING INTERESTS

**MA** has served as consultant for, or has been a paid speaker for clinical trials sponsored by companies that manufacture drugs used for the treatment of psoriasis, including Abbvie, Almirall, Amgen, Biogen, Boehringer Ingelheim, Celgene, Centocor, Eli-Lilly, GSK, Janssen-Cilag, Leo Pharma, Medac, Merck, MSD, Novartis, Pfizer, UCB, and Xenoport; **RS** has been an advisor and/or received speaker honoraria and/or received grants from AbbVie, Almirall, Beiersdorf, Janssen, LEO Pharma and Novartis; **ED** has the following conflict of interests: Advisory Board member, consultant, grants, research support, participation in clinical trials, honorarium for speaking, research support, with the following pharmaceutical companies: Abbvie/Abbott, Almirall, Amgen, Janssen-Cilag, Leo Pharma, Novartis, Pfizer, MSD-Schering-Plough, Celgene, Lilly, and UCB; **PL** received honoraria and/or grants as an investigator, speaker, and/or advisory board member for AbbVie, Almirall, Actelion, Celgene, Janssen, Lilly, Sanofi, Leo, UCB, and Novartis; **EdJ** has received research grants for the independent research fund of the department of dermatology of the Radboud University Medical Center Nijmegen, The Netherlands from AbbVie, Leo Pharma, Janssen Pharmaceuticals, Novartis, Pfizer, and UCB and has acted as consultant and/or paid speaker for and/or participated in research sponsored by companies that manufacture drugs used for the treatment of psoriasis including AbbVie, Almirall, Celgene, Galapagos, Janssen Pharmaceutica, Leo Pharma, Lilly, Novartis, Sanofi, and UCB. All funding is not personal but goes to the independent research fund of the department of dermatology of Radboud University Medical Center Nijmegen (Radboudumc), The Netherlands; **GF** has acted as speaker and consultant for AbbVie, Almirall, Eli Lilly, Leo Pharma, Janssen, Novartis, and UCB; **LN**

1  
2  
3 received consultation fees from Abbvie, Amgen, Boehringer Ingelheim, Celgene, Eli Lilly,  
4  
5 IBSA, Menarini, Janssen, Novartis, and Sanofi; **AN** declares being a consultant and advisor  
6  
7 and/or receiving speaking fees and/or grants and/or served as an investigator in clinical trials  
8  
9 for AbbVie, Almirall, Amgen, BMS, Boehringer Ingelheim, Celgene, Eli Lilly, Galderma,  
10  
11 GSK, LEO Pharma, Janssen-Cilag, MSD, Novartis, Pfizer, Sandoz, Sanofi, Serono and UCB;  
12  
13 **JL** has been a speaker/advisor for and her institution received grants from AbbVie, Almirall,  
14  
15 Argenx, BMS, Celgene, Janssen, LEO Pharma, Eli Lilly, Novartis, Pfizer and UCB; **ZR** has  
16  
17 been an advisor, investigator, and/or speaker for Novartis, Janssen-Cilag, Lilly, eo-Pharma,  
18  
19 Celgene, Pfizer, UCB, Amgen, Almirall, MSD, and MEDAC; **SG** has been an advisor and/or  
20  
21 received speakers' honoraria and/or received grants and/or participated in clinical trials of the  
22  
23 following companies: AbbVie, Affibody AB, Akari Therapeutics Plc, Almirall-Hermal,  
24  
25 Amgen, Anaptys Bio, Argenx BV, AstraZeneca AB, Biogen Idec, Bioskin, Boehringer-  
26  
27 Ingelheim, Celgene, Dermira, Eli Lilly, Forward Pharma, Galderma, Hexal AG, Incyte Inc.,  
28  
29 Janssen-Cilag, Johnson & Johnson, Kymab, Leo Pharma, Medac, MSD, Neubourg Skin Care  
30  
31 GmbH, Novartis, Pfizer, Principia Biopharma, Regeneron Pharmaceutical, Sandoz  
32  
33 Biopharmaceuticals, Sanofi-Aventis, Trevi Therapeutics, and UCB Pharma; **EM** and **IK** are  
34  
35 employees of Almirall; **TO** has served as medical advisor for Almirall; **UM** has been an advisor  
36  
37 and/or received speakers' honoraria and/or received grants and/or participated in clinical trials  
38  
39 of the following companies: AbbVie, Aditxt, Almirall, Amgen, Aristeia, Boehringer-Ingelheim,  
40  
41 Bristol-Myers Squibb, Celgene, Dr. Reddy's, Eli Lilly, Foamix, Formycon, Immunic, Janssen,  
42  
43 LEO Pharma, Medac, MetrioPharm, Novartis, Phi-Stone, Pierre Fabre, Sanofi-Aventis, and  
44  
45 UCB Pharma.

## 53 **FUNDING**

54 This work was supported by Almirall, Barcelona, Spain. Award/grant number: N/A.

## 58 **DATA SHARING STATEMENT**

1  
2  
3  
4  
5  
6  
7  
8  
9  
10  
11  
12  
13  
14  
15  
16  
17  
18  
19  
20  
21  
22  
23  
24  
25  
26  
27  
28  
29  
30  
31  
32  
33  
34  
35  
36  
37  
38  
39  
40  
41  
42  
43  
44  
45  
46  
47  
48  
49  
50  
51  
52  
53  
54  
55  
56  
57  
58  
59  
60

Not applicable.

For peer review only

## REFERENCES

- 1 Mrowietz U, Reich K. Psoriasis--new insights into pathogenesis and treatment. *Dtsch Arztebl Int* 2009;**106**:11–8, quiz 19. doi:10.3238/arztebl.2009.0011
- 2 Bhosle MJ, Kulkarni A, Feldman SR, *et al.* Quality of life in patients with psoriasis. *Health and Quality of Life Outcomes* 2006;**4**:35. doi:10.1186/1477-7525-4-35
- 3 Eghlileb AM, Davies EEG, Finlay AY. Psoriasis has a major secondary impact on the lives of family members and partners. *Br J Dermatol* 2007;**156**:1245–50. doi:10.1111/j.1365-2133.2007.07881.x
- 4 Villacorta R, Teeple A, Lee S, *et al.* A multinational assessment of work-related productivity loss and indirect costs from a survey of patients with psoriasis. *Br J Dermatol* 2020;**183**:548–58. doi:10.1111/bjd.18798
- 5 Global report on psoriasis. <https://www.who.int/publications-detail-redirect/global-report-on-psoriasis> (accessed 17 Nov 2021).
- 6 Koo J, Marangell L b., Nakamura M, *et al.* Depression and suicidality in psoriasis: review of the literature including the cytokine theory of depression. *Journal of the European Academy of Dermatology and Venereology* 2017;**31**:1999–2009. doi:10.1111/jdv.14460
- 7 Sallemi R, Bouhamed M, Masmoudi R, *et al.* Anxiety and depressive symptoms in patients with psoriasis. *European Psychiatry* 2021;**64**:S183–4. doi:10.1192/j.eurpsy.2021.485
- 8 Dubertret L, Mrowietz U, Ranki A, *et al.* European patient perspectives on the impact of psoriasis: the EUOPSO patient membership survey. *Br J Dermatol* 2006;**155**:729–36. doi:10.1111/j.1365-2133.2006.07405.x
- 9 Palota T, Szepietowski JC, Pec J, *et al.* A survey of disease severity, quality of life, and treatment patterns of biologically naive patients with psoriasis in central and eastern Europe. *Acta Dermatovenerol Croat* 2010;**18**:151–61.

- 1  
2  
3 10 Naldi L. Scoring and monitoring the severity of psoriasis. What is the preferred method?  
4  
5 What is the ideal method? Is PASI passé? facts and controversies. *Clin Dermatol*  
6  
7 2010;**28**:67–72. doi:10.1016/j.clindermatol.2009.03.001  
8  
9
- 10 11 Korman NJ, Zhao Y, Pike J, *et al.* Relationship between psoriasis severity, clinical  
11  
12 symptoms, quality of life and work productivity among patients in the USA. *Clin Exp*  
13  
14 *Dermatol* 2016;**41**:514–21. doi:10.1111/ced.12841  
15  
16
- 17 12 Berth-Jones J, Grotzinger K, Rainville C, *et al.* A study examining inter- and intrarater  
18  
19 reliability of three scales for measuring severity of psoriasis: Psoriasis Area and Severity  
20  
21 Index, Physician’s Global Assessment and Lattice System Physician’s Global Assessment.  
22  
23 *Br J Dermatol* 2006;**155**:707–13. doi:10.1111/j.1365-2133.2006.07389.x  
24  
25
- 26 13 Puzenat E, Bronsard V, Prey S, *et al.* What are the best outcome measures for assessing  
27  
28 plaque psoriasis severity? A systematic review of the literature. *J Eur Acad Dermatol*  
29  
30 *Venereol* 2010;**24 Suppl 2**:10–6. doi:10.1111/j.1468-3083.2009.03562.x  
31  
32
- 33 14 da Silva MFP, Fortes MRP, Miot LDB, *et al.* Psoriasis: correlation between severity index  
34  
35 (PASI) and quality of life index (DLQI) in patients assessed before and after systemic  
36  
37 treatment. *An Bras Dermatol* 2013;**88**:760–3. doi:10.1590/abd1806-4841.20132052  
38  
39
- 40 15 Twiss J, Meads DM, Preston EP, *et al.* Can We Rely on the Dermatology Life Quality Index  
41  
42 as a Measure of the Impact of Psoriasis or Atopic Dermatitis? *Journal of Investigative*  
43  
44 *Dermatology* 2012;**132**:76–84. doi:10.1038/jid.2011.238  
45  
46
- 47 16 Langenbruch A, Radtke MA, Gutknecht M, *et al.* Does the Dermatology Life Quality Index  
48  
49 (DLQI) underestimate the disease-specific burden of psoriasis patients? *J Eur Acad*  
50  
51 *Dermatol Venereol* 2019;**33**:123–7. doi:10.1111/jdv.15226  
52  
53
- 54 17 Ali FM, Johns N, Salek S, *et al.* Correlating the Dermatology Life Quality Index with  
55  
56 psychiatric measures: A systematic review. *Clinics in Dermatology* 2018;**36**:691–7.  
57  
58 doi:10.1016/j.clindermatol.2018.08.014  
59  
60

- 1  
2  
3 18 Pattinson RL, Trialonis-Suthakharan N, Gupta S, *et al.* Patient-Reported Outcome  
4 Measures in Dermatology: A Systematic Review. *Acta Derm Venereol*  
5 2021;**101**:adv00559. doi:10.2340/00015555-3884  
6  
7  
8  
9  
10 19 Feldman SR, Regnier SA, Chirilov A, *et al.* Patient-reported outcomes are important  
11 elements of psoriasis treatment decision making: A discrete choice experiment survey of  
12 dermatologists in the United States. *J Am Acad Dermatol* 2019;**80**:1650–7.  
13 doi:10.1016/j.jaad.2019.01.039  
14  
15  
16  
17  
18 20 Montenegro H, Ramagem C, Kawar R, *et al.* Making Progress in People-centred Care:  
19 Country Experiences and Lessons Learnt. *International Journal of Person Centered*  
20 *Medicine* 2012;**2**:64–72. doi:10.5750/ijpcm.v2i1.93  
21  
22  
23  
24  
25 21 Augustin M, Alvaro-Gracia JM, Bagot M, *et al.* A framework for improving the quality of  
26 care for people with psoriasis. *J Eur Acad Dermatol Venereol* 2012;**26 Suppl 4**:1–16.  
27 doi:10.1111/j.1468-3083.2012.04576.x  
28  
29  
30  
31  
32 22 Masson E. Joint AAD-NPF guidelines of care for the management and treatment of  
33 psoriasis with biologics. EM-Consulte. [https://www.em-](https://www.em-consulte.com/article/1281151/joint-aad-npf-guidelines-of-care-for-the-managemen)  
34 [consulte.com/article/1281151/joint-aad-npf-guidelines-of-care-for-the-managemen](https://www.em-consulte.com/article/1281151/joint-aad-npf-guidelines-of-care-for-the-managemen)  
35 (accessed 18 May 2021).  
36  
37  
38  
39  
40  
41 23 Armstrong AW, Puig L, Joshi A, *et al.* Comparison of Biologics and Oral Treatments for  
42 Plaque Psoriasis: A Meta-analysis. *JAMA Dermatol* 2020;**156**:258–69.  
43 doi:10.1001/jamadermatol.2019.4029  
44  
45  
46  
47  
48 24 Langenbruch A, Mohr N, Kirsten N, *et al.* Quality of psoriasis care in Germany - results  
49 from the nationwide health care studies PsoHealth 2004-2017. *J Eur Acad Dermatol*  
50 *Venereol* 2021;**35**:1536–42. doi:10.1111/jdv.17220  
51  
52  
53  
54  
55  
56  
57  
58  
59  
60

- 1  
2  
3 25 Tada Y, Watanabe R, Noma H, *et al.* Short-term effectiveness of biologics in patients with  
4 moderate-to-severe plaque psoriasis: A systematic review and network meta-analysis. *J*  
5  
6 *Dermatol Sci* 2020;**99**:53–61. doi:10.1016/j.jdermsci.2020.06.003  
7  
8  
9  
10 26 Augustin M, Wirth D, Mahlich J, *et al.* Cost per responder analysis of guselkumab versus  
11 targeted therapies in the treatment of moderate to severe plaque psoriasis in Germany. *J*  
12 *Dermatolog Treat* 2020;:1–7. doi:10.1080/09546634.2020.1793891  
13  
14  
15  
16 27 Augustin M, McBride D, Gilloteau I, *et al.* Cost-effectiveness of secukinumab as first  
17 biologic treatment, compared with other biologics, for moderate to severe psoriasis in  
18 Germany. *J Eur Acad Dermatol Venereol* 2018;**32**:2191–9. doi:10.1111/jdv.15047  
19  
20  
21  
22 28 Crowley JJ, Warren RB, Cather JC. Safety of selective IL-23p19 inhibitors for the treatment  
23 of psoriasis. *J Eur Acad Dermatol Venereol* 2019;**33**:1676–84. doi:10.1111/jdv.15653  
24  
25  
26  
27 29 Reich K, Papp KA, Blauvelt A, *et al.* Tildrakizumab versus placebo or etanercept for  
28 chronic plaque psoriasis (reSURFACE 1 and reSURFACE 2): results from two randomised  
29 controlled, phase 3 trials. *The Lancet* 2017;**390**:276–88. doi:10.1016/S0140-  
30 6736(17)31279-5  
31  
32  
33  
34  
35  
36  
37 30 Imafuku S, Kanai Y, Murotani K, *et al.* Utility of the Dermatology Life Quality Index at  
38 initiation or switching of biologics in real-life Japanese patients with plaque psoriasis:  
39 Results from the ProLOGUE study. *Journal of Dermatological Science* 2021;**101**:185–93.  
40 doi:10.1016/j.jdermsci.2021.01.002  
41  
42  
43  
44  
45  
46  
47 31 Strober BE, van der Walt JM, Armstrong AW, *et al.* Clinical Goals and Barriers to Effective  
48 Psoriasis Care. *Dermatol Ther (Heidelb)* 2019;**9**:5–18. doi:10.1007/s13555-018-0279-5  
49  
50  
51  
52 32 Fleming P, Bai JW, Pratt M, *et al.* The prevalence of anxiety in patients with psoriasis: a  
53 systematic review of observational studies and clinical trials. *J Eur Acad Dermatol*  
54 *Venereol* 2017;**31**:798–807. doi:10.1111/jdv.13891  
55  
56  
57  
58  
59  
60

- 1  
2  
3 33 Korman AM, Hill D, Alikhan A, *et al.* Impact and management of depression in psoriasis  
4 patients. *Expert Opin Pharmacother* 2016;**17**:147–52.  
5  
6 doi:10.1517/14656566.2016.1128894  
7  
8  
9  
10 34 Rzeszutek M, Podkowa K, Pięta M, *et al.* Comparative study of life satisfaction among  
11 patients with psoriasis versus healthy comparison group: the explanatory role of body image  
12 and resource profiles. *Qual Life Res* 2021;**30**:181–91. doi:10.1007/s11136-020-02621-3  
13  
14  
15  
16 35 Fortune DG, Richards HL, Kirby B, *et al.* Successful treatment of psoriasis improves  
17 psoriasis-specific but not more general aspects of patients' well-being. *British Journal of*  
18  
19  
20  
21  
22  
23  
24 36 Blome C, Augustin M, Behechtnejad J, *et al.* Dimensions of patient needs in dermatology:  
25 subscales of the patient benefit index. *Arch Dermatol Res* 2011;**303**:11–7.  
26  
27  
28  
29  
30  
31 37 Blome C, Costanzo A, Dauden E, *et al.* Patient-relevant needs and treatment goals in nail  
32 psoriasis. *Qual Life Res* 2016;**25**:1179–88. doi:10.1007/s11136-015-1136-y  
33  
34  
35 38 da Silva N, Augustin M, Langenbruch A, *et al.* Disease burden and treatment needs of  
36 patients with psoriasis in sexually-sensitive and visible body areas: results from a large-  
37  
38  
39  
40  
41  
42  
43 39 da Silva N, Augustin M, Langenbruch A, *et al.* Sex-related impairment and patient  
44 needs/benefits in anogenital psoriasis: Difficult-to-communicate topics and their impact on  
45  
46  
47  
48  
49 40 The World Health Organisation- Five Well-Being Index (WHO-5).  
50  
51  
52  
53  
54  
55  
56  
57  
58  
59  
60



- 1  
2  
3 41 Sustainable Development Goals 3 - The Global Action Plan for Healthy Lives and Well-  
4 being for All. <https://www.who.int/initiatives/sdg3-global-action-plan> (accessed 17 Nov  
5 2021).  
6  
7  
8  
9  
10 42 Schuster B, Ziehfrend S, Albrecht H, *et al.* Happiness in dermatology: a holistic evaluation  
11 of the mental burden of skin diseases. *Journal of the European Academy of Dermatology*  
12 *and Venereology* 2020;**34**:1331–9. doi:10.1111/jdv.16146  
13  
14  
15  
16  
17 43 Topp CW, Østergaard SD, Søndergaard S, *et al.* The WHO-5 Well-Being Index: A  
18 Systematic Review of the Literature. *PPS* 2015;**84**:167–76. doi:10.1159/000376585  
19  
20  
21 44 Mrowietz U, Hartmann A, Weißmann W, *et al.* FamilyPso - a new questionnaire to assess  
22 the impact of psoriasis on partners and family of patients. *J Eur Acad Dermatol Venereol*  
23 2017;**31**:127–34. doi:10.1111/jdv.13872  
24  
25  
26  
27  
28 45 Rencz F, Gulácsi L, Péntek M, *et al.* Proposal of a new scoring formula for the Dermatology  
29 Life Quality Index in psoriasis. *Br J Dermatol* 2018;**179**:1102–8. doi:10.1111/bjd.16927  
30  
31  
32  
33 46 Augustin M, Radtke MA, Zschocke I, *et al.* The patient benefit index: a novel approach in  
34 patient-defined outcomes measurement for skin diseases. *Arch Dermatol Res*  
35 2009;**301**:561–71. doi:10.1007/s00403-009-0928-8  
36  
37  
38  
39  
40 47 Bharmal M, Payne K, Atkinson MJ, *et al.* Validation of an abbreviated Treatment  
41 Satisfaction Questionnaire for Medication (TSQM-9) among patients on antihypertensive  
42 medications. *Health Qual Life Outcomes* 2009;**7**:36. doi:10.1186/1477-7525-7-36  
43  
44  
45  
46  
47 48 Schaarschmidt M-L, Kromer C, Herr R, *et al.* Treatment satisfaction of patients with  
48 psoriasis. *Acta Derm Venereol* 2015;**95**:572–8. doi:10.2340/00015555-2011  
49  
50  
51 49 Wu JJ, Lin C, Sun L, *et al.* Minimal clinically important difference (MCID) for work  
52 productivity and activity impairment (WPAI) questionnaire in psoriasis patients. *J Eur*  
53 *Acad Dermatol Venereol* 2019;**33**:318–24. doi:10.1111/jdv.15098  
54  
55  
56  
57  
58  
59  
60

- 1  
2  
3 50 Kimball AB, Naegeli AN, Edson-Heredia E, *et al.* Psychometric properties of the Itch  
4  
5 Numeric Rating Scale in patients with moderate-to-severe plaque psoriasis. *Br J Dermatol*  
6  
7 2016;**175**:157–62. doi:10.1111/bjd.14464  
8  
9  
10 51 Langley RG, Ellis CN. Evaluating psoriasis with Psoriasis Area and Severity Index,  
11  
12 Psoriasis Global Assessment, and Lattice System Physician’s Global Assessment. *J Am*  
13  
14 *Acad Dermatol* 2004;**51**:563–9. doi:10.1016/j.jaad.2004.04.012  
15  
16  
17 52 Langley RGB, Feldman SR, Nyirady J, *et al.* The 5-point Investigator’s Global Assessment  
18  
19 (IGA) Scale: A modified tool for evaluating plaque psoriasis severity in clinical trials. *J*  
20  
21 *Dermatolog Treat* 2015;**26**:23–31. doi:10.3109/09546634.2013.865009  
22  
23  
24 53 The Professional Quality of Life Scale – 5 (ProQOL). NovoPsych.  
25  
26 2021. [https://novopsych.com.au/assessments/clinician-self-assessment/the-professional-](https://novopsych.com.au/assessments/clinician-self-assessment/the-professional-quality-of-life-scale-5-proqol/)  
27  
28 [quality-of-life-scale-5-proqol/](https://novopsych.com.au/assessments/clinician-self-assessment/the-professional-quality-of-life-scale-5-proqol/) (accessed 17 Nov 2021).  
29  
30  
31 54 Liu L, Li S, Zhao Y, *et al.* Health state utilities and subjective well-being among psoriasis  
32  
33 vulgaris patients in mainland China. *Qual Life Res* 2018;**27**:1323–33. doi:10.1007/s11136-  
34  
35 018-1819-2  
36  
37  
38  
39  
40  
41  
42  
43  
44  
45  
46  
47  
48  
49  
50  
51  
52  
53  
54  
55  
56  
57  
58  
59  
60

1  
2  
3  
4  
5  
6  
7  
8  
9  
10  
11  
12  
13  
14  
15  
16  
17  
18  
19  
20  
21  
22  
23  
24  
25  
26  
27  
28  
29  
30  
31  
32  
33  
34  
35  
36  
37  
38  
39  
40  
41  
42  
43  
44  
45  
46  
47  
48  
49  
50  
51  
52  
53  
54  
55  
56  
57  
58  
59  
60

**FIGURES**

**Figure 1.** Study design of the POSITIVE study

For peer review only

1  
2  
3  
4  
5  
6  
7  
8  
9  
10  
11  
12  
13  
14  
15  
16  
17  
18  
19  
20  
21  
22  
23  
24  
25  
26  
27  
28  
29  
30  
31  
32  
33  
34  
35  
36  
37  
38  
39  
40  
41  
42  
43  
44  
45  
46  
47  
48  
49  
50  
51  
52  
53  
54  
55  
56  
57  
58  
59  
60

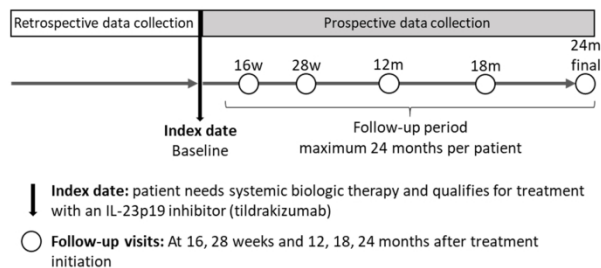

254x190mm (300 x 300 DPI)

# BMJ Open

## PATIENT-REPORTED WELL-BEING IN VALUE-BASED CARE USING TILDRAKIZUMAB IN A REAL WORLD SETTING: PROTOCOL OF A MULTI-NATIONAL, PHASE IV, 1 COHORT PROSPECTIVE OBSERVATIONAL STUDY (THE POSITIVE STUDY)

|                                 |                                                                                                                                                                                                                                                                                                                                                                                                                                                                                                                                                                                                                                                                                                                                                                                                                                                                                                                                                                                                                                                                                                                                                                                                                                                                                                                                                                                                                                     |
|---------------------------------|-------------------------------------------------------------------------------------------------------------------------------------------------------------------------------------------------------------------------------------------------------------------------------------------------------------------------------------------------------------------------------------------------------------------------------------------------------------------------------------------------------------------------------------------------------------------------------------------------------------------------------------------------------------------------------------------------------------------------------------------------------------------------------------------------------------------------------------------------------------------------------------------------------------------------------------------------------------------------------------------------------------------------------------------------------------------------------------------------------------------------------------------------------------------------------------------------------------------------------------------------------------------------------------------------------------------------------------------------------------------------------------------------------------------------------------|
| Journal:                        | <i>BMJ Open</i>                                                                                                                                                                                                                                                                                                                                                                                                                                                                                                                                                                                                                                                                                                                                                                                                                                                                                                                                                                                                                                                                                                                                                                                                                                                                                                                                                                                                                     |
| Manuscript ID                   | bmjopen-2021-060536.R1                                                                                                                                                                                                                                                                                                                                                                                                                                                                                                                                                                                                                                                                                                                                                                                                                                                                                                                                                                                                                                                                                                                                                                                                                                                                                                                                                                                                              |
| Article Type:                   | Protocol                                                                                                                                                                                                                                                                                                                                                                                                                                                                                                                                                                                                                                                                                                                                                                                                                                                                                                                                                                                                                                                                                                                                                                                                                                                                                                                                                                                                                            |
| Date Submitted by the Author:   | 18-Nov-2022                                                                                                                                                                                                                                                                                                                                                                                                                                                                                                                                                                                                                                                                                                                                                                                                                                                                                                                                                                                                                                                                                                                                                                                                                                                                                                                                                                                                                         |
| Complete List of Authors:       | <p>Augustin, Matthias; University Medical Center Hamburg-Eppendorf, Institute for Health Services Research in Dermatology and Nursing (IVDP)</p> <p>Sommer, Rachel; University Medical Center Hamburg-Eppendorf, Institute for Health Services Research in Dermatology and Nursing (IVDP)</p> <p>Dauden, E.; La Princesa University Hospital, Instituto de Investigación Sanitaria La Princesa (IIS-IP)</p> <p>Laws, Philip; Leeds Teaching Hospitals NHS Trust</p> <p>de Jong, Elke; Radboud University Medical Center (Radboudumc), Department of Dermatology</p> <p>Fabbrocini, Gabriella; University of Naples Federico II, Section of Dermatology, Department of Clinical Medicine and Surgery</p> <p>Naldi, Luigi; San Bortolo Hospital, Division of Dermatology</p> <p>Navarini, Alexander; University Hospital Basel, Department of Dermatology</p> <p>Lambert, Jo; Ghent University Hospital, Department of Dermatology</p> <p>Reguai, Ziad; Polyclinic Courlancy, Department of Dermatology</p> <p>Gerdes, Sascha; University Medical Center Schleswig-Holstein, Campus Kiel, Center for Inflammatory Skin Diseases, Department of Dermatology, Venereology and Allergology</p> <p>Massana, Eric; Almirall GMA</p> <p>Obis, Teresa; Almirall GMA</p> <p>Kasujee, Ismail; Almirall GMA</p> <p>Mrowietz, Ulrich; University Medical Center Schleswig-Holstein, Campus Kiel, Psoriasis-Center, Department of Dermatology</p> |
| <b>Primary Subject Heading</b>: | Patient-centred medicine                                                                                                                                                                                                                                                                                                                                                                                                                                                                                                                                                                                                                                                                                                                                                                                                                                                                                                                                                                                                                                                                                                                                                                                                                                                                                                                                                                                                            |
| Secondary Subject Heading:      | Dermatology                                                                                                                                                                                                                                                                                                                                                                                                                                                                                                                                                                                                                                                                                                                                                                                                                                                                                                                                                                                                                                                                                                                                                                                                                                                                                                                                                                                                                         |
| Keywords:                       | Psoriasis < DERMATOLOGY, THERAPEUTICS, EPIDEMIOLOGY                                                                                                                                                                                                                                                                                                                                                                                                                                                                                                                                                                                                                                                                                                                                                                                                                                                                                                                                                                                                                                                                                                                                                                                                                                                                                                                                                                                 |
|                                 |                                                                                                                                                                                                                                                                                                                                                                                                                                                                                                                                                                                                                                                                                                                                                                                                                                                                                                                                                                                                                                                                                                                                                                                                                                                                                                                                                                                                                                     |

1  
2  
3  
4  
5  
6  
7  
8  
9  
10  
11  
12  
13  
14  
15  
16  
17  
18  
19  
20  
21  
22  
23  
24  
25  
26  
27  
28  
29  
30  
31  
32  
33  
34  
35  
36  
37  
38  
39  
40  
41  
42  
43  
44  
45  
46  
47  
48  
49  
50  
51  
52  
53  
54  
55  
56  
57  
58  
59  
60

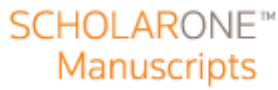

1  
2  
3 **PATIENT-REPORTED WELL-BEING IN VALUE-BASED CARE USING**  
4  
5 **TILDRAKIZUMAB IN A REAL-WORLD SETTING: PROTOCOL OF A MULTI-**  
6  
7 **NATIONAL, PHASE IV, 1-COHORT PROSPECTIVE OBSERVATIONAL STUDY**  
8  
9 **(THE POSITIVE STUDY)**  
10  
11

12 Matthias Augustin<sup>1</sup>, Rachel Sommer<sup>1</sup>, Esteban Daudén<sup>2</sup>, Phillip Laws<sup>3</sup>, Elke MGJ de Jong<sup>4</sup>,  
13  
14 Gabriella Fabbrocini<sup>5</sup>, Luigi Naldi<sup>6</sup>, Alexander Navarini<sup>7</sup>, Jo Lambert<sup>8</sup>, Ziad Reguiai<sup>9</sup>, Sascha  
15  
16 Gerdes<sup>10</sup>, Eric Massana<sup>11</sup>, Teresa Obis<sup>11</sup>, Ismail Kasujee<sup>11</sup>, and Ulrich Mrowietz<sup>12</sup>  
17  
18

19 <sup>1</sup> *Institute for Health Services Research in Dermatology and Nursing (IVDP), University*  
20 *Medical Center Hamburg-Eppendorf (UKE), Hamburg, Germany.*

21 <sup>2</sup> *La Princesa University Hospital, Instituto de Investigación Sanitaria La Princesa (IIS-IP),*  
22 *Madrid, Spain.*

23 <sup>3</sup> *Leeds Teaching Hospitals NHS Trust, Leeds, the United Kingdom.*

24 <sup>4</sup> *Department of Dermatology, Radboud University Medical Center (Radboudumc), Nijmegen,*  
25 *The Netherlands.*

26 <sup>5</sup> *Section of Dermatology, Department of Clinical Medicine and Surgery, University of Naples*  
27 *Federico II, Naples, Italy.*

28 <sup>6</sup> *Division of Dermatology, San Bortolo Hospital, Vicenza, Italy.*

29 <sup>7</sup> *Department of Dermatology, University Hospital Basel, Basel, Switzerland.*

30 <sup>8</sup> *Department of Dermatology, Ghent University Hospital, Ghent, Belgium.*

31 <sup>9</sup> *Dermatology Department, Polyclinic Courlancy, Reims, France.*

32 <sup>10</sup> *Center for Inflammatory Skin Diseases, Department of Dermatology, Venereology and*  
33 *Allergology, University Medical Center Schleswig-Holstein, Campus Kiel, Kiel, Germany.*

34 <sup>11</sup> *Almirall GMA, Barcelona, Spain.*

35 <sup>12</sup> *Psoriasis-Center, Department of Dermatology, University Medical Center Schleswig-*  
36 *Holstein, Campus Kiel, Kiel, Germany.*  
37  
38  
39

40  
41 **Corresponding author**  
42

43 Prof. Dr. med. Matthias Augustin  
44

45 Director, Institute for Health Services Research in Dermatology and Nursing (IVDP),  
46

47 University Medical Center Hamburg-Eppendorf (UKE)  
48

49 Martinistr. 52, 20246 Hamburg, Germany  
50

51 E-mail: [m.augustin@uke.de](mailto:m.augustin@uke.de)  
52  
53

54  
55 **Word count:** 4,319  
56  
57  
58  
59  
60

## ABSTRACT

**Introduction:** Psoriasis is a chronic inflammatory skin disease that negatively impacts the quality of life of patients and their families. However, the most commonly used decision-making tools in psoriasis, Psoriasis Area and Severity Index (PASI), Physician Global Assessment (PGA) and Dermatology Life Quality Index (DLQI), do not fully capture the impact of psoriasis on patients' lives. In contrast, the well-established 5-item World Health Organization Well-being Index (WHO-5) assesses the subjective psychological well-being of patients. Moreover, while drug innovations became available for psoriasis, data on the impact of these therapies on patients' lives and their closest environment (family, physicians) is limited. This study will assess the effect of tildrakizumab, an interleukin-23p19 inhibitor, on the overall well-being of patients with moderate-to-severe psoriasis. Moreover, the long-term benefit of tildrakizumab on physicians' satisfaction and psoriasis patients' partners' lives will be evaluated.

**Methods and analysis:** This non-interventional, prospective, observational, real-world evidence study will involve multiple sites in Europe and approximately 500 adults with moderate-to-severe psoriasis treated with tildrakizumab. Each patient will be followed for 24 months. The primary endpoint is well-being measured by the WHO-5 questionnaire. Key secondary endpoints include Physician's Satisfaction and partner's quality of life (FamilyPso). Other endpoints will evaluate skin-generic quality of life (DLQI-R), Treatment Satisfaction Questionnaire for Medication (TSQM-9), Treatment-related Patient Benefit Index "Standard", 10 items (PBI-S-10), and work productivity and activity impairment (WPAI). Statistical analyses will be based on observed cases. Multiple imputation will be performed as a sensitivity analysis, and adverse events will be reported.

**Ethics and dissemination:** The study will be conducted according to the protocol, which received ethics committee approval and applicable regulatory requirements of each



1  
2  
3 participating country. The results will be disseminated through scientific publications and  
4  
5 congress presentations.  
6  
7  
8  
9

10 **Registration details:** NCT04823247.  
11  
12  
13  
14  
15  
16  
17  
18  
19  
20  
21  
22  
23  
24  
25  
26  
27  
28  
29  
30  
31  
32  
33  
34  
35  
36  
37  
38  
39  
40  
41  
42  
43  
44  
45  
46  
47  
48  
49  
50  
51  
52  
53  
54  
55  
56  
57  
58  
59  
60

For peer review only

## STRENGTHS AND LIMITATIONS OF THIS STUDY

- First clinical study in dermatology using the patient-reported well-being as the primary endpoint in accordance with the holistic definition of health by the World Health Organization (WHO).
- Innovative secondary endpoints such as physician's well-being, patient-defined benefit assessment and the impact of psoriasis on the patients' partner following a people-centred approach claimed by the WHO.
- Relevant sample size from different European countries.
- Patients may experience a biased self-perception due to their inclusion in a clinical study.
- Potential drop-outs or losses to follow-up due to the long observational period.

## INTRODUCTION

Psoriasis is an immune-mediated, chronic relapsing inflammatory condition characterised by abnormal differentiation and proliferation of the epidermis affecting skin, nails, and joints [1]. The severity of psoriasis is profound as it includes physical and psychological components [2]. Increasing evidence suggest that psoriasis considerably affects the overall well-being of patients and their families [3], as well as their personal, social, and occupational life [4], often resulting in psychological distress and depression [5–7]. A Europe-wide survey examining quality of life reported that almost 77% of patients believed psoriasis negatively affected normal daily activities and well-being [8]. Moreover, a more recent survey showed that psoriasis patients generally report poor quality of life and physicians are often also not satisfied with their patients' treatment [9]. These studies highlight the need for a well-being evaluation strategy besides the available psoriasis severity scoring assessments [10]. Patient-reported outcomes (PROs) are being used with increasing frequency in clinical trials and provide valuable information on how psoriasis affects physical, social, and psychological aspects of patients' lives. However, the most commonly used decision-making tools in psoriasis, the clinician-reported Psoriasis Area Severity Index (PASI), Physician Global Assessment (PGA) and the patient-reported Dermatology Life Quality Index (DLQI), do not take into account the entire patient disease perspective, leading to misaligned perception between physicians and patients [11]. While the PASI and PGA track changes in psoriasis severity from a clinician's perspective [12,13], the skin-generic DLQI has been used to evaluate psoriasis symptoms and their impact on quality of life [14]. However, the use of the DLQI has been associated with several measurement problems related to age, gender difference, inadequate power to differentiate patients with mild illness, and underestimating patient's emotional status [15,16]. Furthermore, being a sum score and permitting to rate "not relevant" in 8 out of 10 items, DLQI has been shown to provide marked bias and to underestimate the burden of very severely affected

1  
2  
3 patients[16]. Moreover, a systematic review on skin conditions has highlighted the critical need  
4  
5 for psychiatric assessments in addition to the DLQI score for a full assessment of patient  
6  
7  
8  
9  
10  
11  
12  
13  
14  
15  
16  
17  
18  
19  
20  
21  
22  
23  
24  
25  
26  
27  
28  
29  
30  
31  
32  
33  
34  
35  
36  
37  
38  
39  
40  
41  
42  
43  
44  
45  
46  
47  
48  
49  
50  
51  
52  
53  
54  
55  
56  
57  
58  
59  
60

patients[16]. Moreover, a systematic review on skin conditions has highlighted the critical need for psychiatric assessments in addition to the DLQI score for a full assessment of patient psychological well-being [17,18].

### **Unmet needs at the time of biologics**

Studies have indicated that a patient-oriented evaluation is critical for overall symptom assessment as physicians' indicators alone cannot capture the disease burden of psoriasis [19–21]. The advent of biologics as monotherapy or in combination with other topical or systemic medications significantly changed the treatment approach for psoriasis representing an advancement over topical treatments or traditional immunosuppressive therapies [22–24]. Biologics target specific components of the immune system and have shown a high benefit-to-risk ratio, high efficacy and acceptable safety profiles [25]. Further, more advanced biologics have been shown to be more cost-effective than first-generation drugs [26,27]. Monoclonal antibodies, selective for the interleukin (IL)-23p19 subunit inhibition, represent a new standard of treatment currently available for the long-term management of psoriasis [28]. Among these, tildrakizumab has demonstrated long-term efficacy and safety in the pivotal phase III studies (reSURFACE 1 and 2) comparing tildrakizumab versus placebo or etanercept for moderate-to-severe psoriasis [29]. However, while biologics are becoming a more important treatment option for individuals with psoriasis, current therapy goals and PROs in dermatology do not fully capture the impact of this therapy on patients' and physicians' well-being [30,31]. Moreover, although several studies have shown that psoriasis significantly affects mental health [32,33], standard severity scores have been found to be very weakly associated with the overall well-being of these patients [34,35]. In practice, there is high need to translate patient burden to patients needs and then derive patient goals conjointly with the patient. Thus, understanding the needs and expectations of patients beyond measuring burden constitutes a fundamental part

1  
2  
3 of treatment in psoriasis [36]. This is particularly important in sensitive conditions such as nail  
4 and anogenital affections [37–39].  
5  
6  
7

### 8 **Well-being in psoriasis: clinical goals**

9  
10 Insights on the well-being of the patients are based on the patient's view of their condition, and  
11 this concept is increasingly being embraced as a more comprehensive outcome in line with a  
12 holistic view and people-centred perspective, but still undervalued in traditional PROs. Well-  
13 being is a holistic multifaceted concept that in a study context describes “to what extent patients  
14 will get their healthy lives back”, where mental, physical, and social functioning are  
15 interdependent [40]. According to the World Health Organisation (WHO), the ultimate goal of  
16 therapy in chronic diseases such as psoriasis is achieving well-being [41]. Nevertheless, well-  
17 being has been rarely measured in dermatology so far. A recent study concluded that the DLQI  
18 primarily measures physical impairment associated with negative emotions and, thus, provides  
19 only a limited evaluation of well-being [42]. Therefore, assessing well-being or specific  
20 dimensions of well-being can contribute to a holistic evaluation of patients' health in  
21 accordance with the WHO's holistic definition.  
22  
23  
24  
25  
26  
27  
28  
29  
30  
31  
32  
33  
34  
35  
36  
37  
38

### 39 **Innovative endpoints in this study**

40  
41 To assess patient well-being, this study will apply the 5-item WHO Well-being Index (WHO-  
42 5), a widely used questionnaire assessing psychological health-related well-being in a variety  
43 of chronic diseases such as diabetes, cardiovascular disease, cancer, and depression [43]. For  
44 the first time, WHO-5 will be used as a primary endpoint in patients with psoriasis to investigate  
45 the improvements that tildrakizumab can achieve on patients' well-being in a real-world setting.  
46 Moreover, building a positive cross-talk environment between healthcare professionals and  
47 patients is critical. A meta-analysis study including 400 publications reported a higher quality  
48 of life and overall improved treatment outcome when patients had higher trust in their physician  
49  
50  
51  
52  
53  
54  
55  
56  
57  
58  
59  
60

1  
2  
3 [21], underlining how physician's well-being is essential as it can improve patients' satisfaction  
4 and interpersonal aspects of care [22]. Patient's behaviour, in turn, can affect physicians' well-  
5 being, including unrealistic expectations, aggression, or by developing family-like  
6 relationships, resulting in emotional detachment and burnout [23]. As there is no complete  
7 correlation between patient- and physician-reported outcome measures, both PROs and  
8 physician-reported scores should be considered when assessing treatment outcomes [24]. In this  
9 study, the 'Physician's satisfaction' score will be exploited as an innovative tool to investigate  
10 the impact of the psoriasis treatment process on physicians' well-being. Furthermore,  
11 information on the impact of psoriasis on patients' families, particularly partners, is also  
12 lacking, even though the impact of skin disease on family members or partners of patients  
13 should be measured while evaluating the burden of psoriasis [3]. Thus, this study will include  
14 the questionnaire FamilyPso [44], enabling physicians to better understand the impact of  
15 psoriasis as a lifelong chronic disease on partners. This study will provide novel insights into  
16 the dimensions of patients' perspectives and their overall state of well-being using a holistic  
17 patient-partner and physicians-centred approach. The current study is designed to investigate  
18 patient-reported well-being using tildrakizumab in a real-world setting, as well as the impact  
19 on their closing environment, including partners and physicians, to provide a more  
20 comprehensive overview of people-centred healthcare and their overall state of well-being.  
21  
22  
23  
24  
25  
26  
27  
28  
29  
30  
31  
32  
33  
34  
35  
36  
37  
38  
39  
40  
41  
42  
43  
44  
45  
46  
47  
48  
49  
50  
51  
52  
53  
54  
55  
56  
57  
58  
59  
60

## METHODS AND ANALYSIS

The primary objective is to assess the effect of tildrakizumab on the overall well-being in patients with moderate-to-severe psoriasis using the WHO-5 questionnaire. Secondary objectives include: to evaluate the long-term benefit of tildrakizumab on physician's satisfaction (Physician's Satisfaction Questionnaire) and the impact of psoriasis on patients' partners (FamilyPso questionnaire); to assess the long-term benefit of tildrakizumab reported by patients in terms of skin-generic quality of life (DLQI-R), treatment satisfaction (TSQM-9) and treatment-related benefits (PBI-S-10), work impairment due to psoriasis (WPAI:PSO) and extent of the skin manifestations on the entire body using a "heat map" in a subgroup of patients; to correlate the change of WHO-5 with patients' health-related quality of life (HRQoL) and patients' treatment benefits; to assess the control of skin manifestations (absolute PASI) and its impact on patients, physician's satisfaction and on partners of patients; to describe the socio-demographic and clinical profile of the patients being treated with tildrakizumab, according to the routine clinical practice; and to assess the safety and tolerability of tildrakizumab in a real-world setting. Exploratory objectives are to assess the impact of tildrakizumab on PGA of the skin manifestations and to assess the concordance between patients and physician's satisfaction regarding response to the treatment with tildrakizumab.

### Study design

This is an ethics-approved, multi-national, phase IV, 1-cohort prospective observational study planned to be conducted in several countries (Austria, Belgium, France, Germany, Italy, Spain, Switzerland, The Netherlands, and United Kingdom [UK]) to assess patient-reported well-being using tildrakizumab in a live setting. The study design is summarised in **Figure 1**.

### Study population

The study population will comprise a minimum of 338 patients with moderate-to-severe plaque psoriasis who need systemic biologic therapy and qualify for treatment with an IL-23p19 inhibitor in real-world clinical practice. Consecutive patients satisfying all the inclusion criteria and none of the exclusion criteria shown in **Table 1** to be eligible for participation will be offered participation. Recruitment will be competitive across all countries participating in the study (i.e., no fixed number of patients per country).

**Table 1.** Eligibility criteria

| <b>Inclusion criteria</b> |                                                                                                                                                                                                         |
|---------------------------|---------------------------------------------------------------------------------------------------------------------------------------------------------------------------------------------------------|
| 1                         | Patient with diagnosis of moderate-to-severe chronic plaque psoriasis documented in the medical chart.                                                                                                  |
| 2                         | Patient who needs systemic biologic therapy and qualifies for treatment with an IL-23p19 inhibitor. Tildrakizumab must be the anti-IL-23p19 selected therapy before including the patient in the study. |
| 3                         | Patient aged 18 years or older at the time of patient recruitment.                                                                                                                                      |
| 4                         | Patient who has provided written informed consent (if required by country regulations).                                                                                                                 |
| <b>Exclusion criteria</b> |                                                                                                                                                                                                         |
| 1                         | Patients unable to comply with the requirements of the study or who, in the opinion of the study physician, should not participate in the study.                                                        |
| 2                         | Patients included in a clinical trial.                                                                                                                                                                  |

IL, interleukin.

## Endpoints

Study endpoints cover outcomes reported by patients, their partners, and physicians. The primary endpoint is to assess the overall health-related well-being (evaluated through WHO-5 questionnaire) in patients treated with tildrakizumab according to the marketing authorization and routine clinical practice at the long-term. The secondary endpoints are: physicians' satisfaction evaluation through a composite survey with 16 items (10 generic professional quality of life items and 6 items related to the biological treatment); partner well-being evaluation through the FamilyPso questionnaire; patient's perspective on tildrakizumab long-term benefit evaluation through the (i) skin-generic quality of life questionnaire (DLQI-R), (ii) Treatment Satisfaction Questionnaire for Medication (TSQM-9), (iii) Treatment-related Patient



Benefit Index “Standard”, 10 items (PBI-S-10), (iv) Work Productivity and Activity Impairment Questionnaire: Psoriasis (WPAI:PSO), (v) skin manifestations distribution (heat map/patient’s grid in a subgroup of patients) according to location and total percentage of area affected, and (vi) the Numeric Rating Scale (NRS) for itch, pain, joint pain, and fatigue assessments; disease control evaluated through the absolute PASI; description of the sociodemographic (age, gender, educational and working status, etc.) and clinical (location of moderate-to-severe psoriasis, comorbid disease, laboratory tests, etc.) characteristics; adverse events (AE) reported during the use of tildrakizumab. The exploratory endpoints are: the control of the skin manifestation evaluation through the PGA; Patient’s and physician’s opinion about tildrakizumab treatment in relation to the therapeutic objectives’ evaluation through the Patient’s and physician’s questionnaire (**Table 2**).

**Table 2.** Endpoints of the study

|                              | <b>Patient reported outcomes</b>                                                                                                                                                                                | <b>Partners reported outcomes</b> | <b>Physician reported outcomes</b>            | <b>Patient and physician reported outcomes</b> |
|------------------------------|-----------------------------------------------------------------------------------------------------------------------------------------------------------------------------------------------------------------|-----------------------------------|-----------------------------------------------|------------------------------------------------|
| <b>Primary endpoint</b>      | - WHO-5                                                                                                                                                                                                         |                                   |                                               |                                                |
| <b>Secondary endpoint</b>    | - DLQI-R<br>- TSQM-9<br>- PBI-S-10<br>- WPAI: PSO<br>- Patient grid<br>- NRS (itch, pain, joint pain, fatigue assessments)<br>- Sociodemographic and clinical characteristics<br>- AEs during tildrakizumab use | - FamilyPso                       | - Physicians’ satisfaction<br>- Absolute PASI |                                                |
| <b>Exploratory endpoints</b> |                                                                                                                                                                                                                 |                                   | - PGA                                         | - Patient’s and physician’s questionnaire      |

|  |  |  |  |                                                                     |
|--|--|--|--|---------------------------------------------------------------------|
|  |  |  |  | - Patient's and physician's satisfaction of being part of the study |
|--|--|--|--|---------------------------------------------------------------------|

AE, adverse event; DLQI-R, Dermatology Life Quality Index-Revised; NRS, Numeric Rating Scale; PASI, Psoriasis Area Severity Index; PBI-S-10, Patient Benefit Index "Standard", 10 items short form; PGA, Physician Global Assessment; TSQM-9, Treatment Satisfaction Questionnaire for Medication; WHO-5, World Health Organization-Five Well-being Index; WPAI:PSO, Work Productivity and Activity Impairment Questionnaire: Psoriasis.

### Data sources and collection

All data will be collected prospectively from the medical charts and entered directly into the electronic data capture system. The study will include both variables extracted from the medical chart and obtained directly from the patients. No visits or examinations, laboratory tests, or procedures are mandated or recommended as part of this study. The data collection schedule is shown in **Table 3**.

**Table 3.** Data collection schedule

|                                                                                    | Baseline visit | Follow-up visit (at 16 and 28 weeks, 12 and 18 months after baseline visit) | Final visit (24 months from baseline) | Early termination visit |
|------------------------------------------------------------------------------------|----------------|-----------------------------------------------------------------------------|---------------------------------------|-------------------------|
| Patient characteristics and demographics (including date of ICF signature)         | X              |                                                                             | X <sup>a</sup>                        | X <sup>a</sup>          |
| Disease characteristics (diagnosis date, type of psoriasis, severity of psoriasis) | X              |                                                                             |                                       |                         |
| Laboratory test (if it is available)                                               | X              | X                                                                           | X                                     | X                       |
| Comorbidities                                                                      | X              | X                                                                           | X                                     | X                       |
| Concomitant medication                                                             | X              | X                                                                           | X                                     | X                       |
| Drug therapy history                                                               | X              |                                                                             |                                       |                         |
| Tildrakizumab drug therapy (dose)                                                  | X              | X                                                                           | X                                     | X                       |
| PASI                                                                               | X              | X                                                                           | X                                     | X                       |

|                                                                                         | Baseline visit | Follow-up visit (at 16 and 28 weeks, 12 and 18 months after baseline visit) | Final visit (24 months from baseline) | Early termination visit |
|-----------------------------------------------------------------------------------------|----------------|-----------------------------------------------------------------------------|---------------------------------------|-------------------------|
| Heat map/patient's grid (subgroup of patients): location of skin manifestations         | X              | X                                                                           | X                                     | X                       |
| Adverse event reporting                                                                 | X              | X                                                                           | X                                     | X                       |
| <b>Questionnaires</b>                                                                   |                |                                                                             |                                       |                         |
| WHO-5                                                                                   | X              | X                                                                           | X                                     | X                       |
| DLQI-R                                                                                  | X              | X                                                                           | X                                     | X                       |
| PBI-S-10                                                                                | X              | X                                                                           | X                                     | X                       |
| TSQM-9                                                                                  | X              | X                                                                           | X                                     | X                       |
| WPAI:PSO                                                                                | X              | X                                                                           | X                                     | X                       |
| FamilyPso                                                                               | X              | X                                                                           | X                                     | X                       |
| NRS (itch, pain, joint pain, fatigue)                                                   | X              | X                                                                           | X                                     | X                       |
| Patient's and Physician's satisfaction of being part in the study (open field question) | X              |                                                                             | X                                     | X                       |
| PGA                                                                                     | X              | X                                                                           | X                                     | X                       |
| Physician's satisfaction                                                                | X              | X                                                                           | X                                     | X                       |
| Patient's and physician's questionnaire                                                 |                | X                                                                           | X                                     | X                       |

DLQI-R, Dermatology Life Quality Index-Revised; ICF, informed consent form; NRS, Numeric Rating Scale; PASI, Psoriasis Area Severity Index; PBI-S-10, Patient Benefit Index "Standard", 10 items short form; PGA, Physician Global Assessment; TSQM-9, Treatment Satisfaction Questionnaire for Medication ;WHO-5, World Health Organization-Five Well-being Index; WPAI:PSO, Work Productivity and Activity Impairment Questionnaire: Psoriasis; a, Variables such as gender or height will not be collected at these visits .

## Questionnaires

All the questionnaires included in the study have validated translations according to international guidelines from the original language to the official languages in the participating countries.

### Primary endpoint:

1. The 5-item World Health Organization Well-being Index (WHO-5): The WHO-5 is a generic global rating scale measuring subjective well-being containing positive statements. The respondent is asked to rate how well each of the 5 items applies to him

1  
2  
3 or her when considering the last 14 days. Each of the 5 items is scored from 5 (all of the  
4 time) to 0 (none of the time). The raw score therefore theoretically ranges from 0  
5 (absence of well-being) to 25 (maximal well-being). To standardize the score on a scale  
6 from 0 (absent) to 100 (maximal), it is recommended to multiply the raw score by 4  
7 [43].  
8  
9

### 14 **Secondary endpoints:**

- 15  
16  
17 2. Dermatology Life Quality Index-Relevant (DLQI-R): The DLQI-R is a recently  
18 developed scoring that adjusts the total score of the questionnaire for the number of 'not  
19 relevant' responses indicated by a patient. It is a self-administrated questionnaire  
20 validated as a dermatology-specific quality of life instrument. It includes 10 items to  
21 assess patient's HRQoL during the previous week on a 4-point scale, indicating 'not at  
22 all', 'a little', 'a lot' and 'very much', respectively. For each patient, the DLQI-R score  
23 is estimated as a sum score of the original DLQI score replacing items rated "not  
24 relevant" by the mean of the other items [45].  
25  
26 3. Patient Benefit Index "Standard", 10-item short form (PBI-S-10: 10 items describing  
27 treatment goals of patients with skin diseases. Before treatment, these goals are rated on  
28 a 5-point Likert-scale (0="not at all", 4="very") according to their perceived relevance  
29 (PNQ). Alternatively, patients can state that a goal "does not apply" to them. In the  
30 course of treatment, patients are asked to express the achievement of these 10 treatment  
31 goals (treatment benefit) on the same 5-point Likert-scale (PBQ), again with the  
32 opportunity to state that the goal did not apply [46]. An overall index of patient benefits  
33 (PBI) is calculated by adding the single weighted benefits to a sum score reaching from  
34 0=no patient benefit to 4=very strong patient benefit.  
35  
36 4. Treatment Satisfaction Questionnaire for Medication (TSQM-9): It is a self-  
37 administrated questionnaire that measures patients' drug therapy satisfaction  
38  
39  
40  
41  
42  
43  
44  
45  
46  
47  
48  
49  
50  
51  
52  
53  
54  
55  
56  
57  
58  
59  
60

1  
2  
3 considering the last two or three weeks or since the last time the patient took the  
4 medication. It consists of 9 statements distributed in 3 domains: efficacy (3 items),  
5 convenience (3 items) and global satisfaction (3 items). Responses are measured on a  
6 Likert scale of 5 or 7 points [47,48].  
7  
8  
9  
10

- 11  
12 5. Work Productivity and Activity Impairment Questionnaire: Psoriasis (WPAI: PSO): It  
13 is a self-administrated questionnaire that measures the impact on the work productivity  
14 in patients with psoriasis considering the last seven days. The questionnaire contains 6  
15 items with dichotomous response options [49].  
16  
17  
18  
19  
20
- 21 6. Numeric Rating Scale (NRS) (itch, pain, joint pain, fatigue): It is a self-administrated  
22 questionnaire to assess patients' itch severity, pain, joint pain and fatigue. The  
23 questionnaire has a single-item that describes the worst level of itching, joint pain and  
24 fatigue, respectively, due to psoriasis in the past 24 hours [50].  
25  
26  
27  
28  
29
- 30 7. FamilyPso: It is a self-administrated questionnaire to assess the burden on partners of  
31 patients with psoriasis. The questionnaire has 15 items divided in 5 factors: 1) Perceived  
32 strain by social reactions to the partner's psoriasis; 2) Strain caused by cleaning; 3)  
33 Acute emotional strain attributed directly to the psoriasis; 4) Restrictions of social life;  
34 5) General emotional strain. The items are scaled in a 5-point Likert format: 0='not  
35 true', 1='somewhat true', 2='moderately true', 3='quite true', 4='very true', with the  
36 supplementary option 'does not apply to me' [44].  
37  
38  
39  
40  
41  
42  
43  
44  
45  
46
- 47 8. Patient's and physician's questionnaire: Survey of 10 questions elaborated for this  
48 project with the objective to assess the opinion of physicians and patients about  
49 tildrakizumab treatment in relation to the therapeutic objectives. The physician will  
50 respond according to his/her assessment in relation to the response to tildrakizumab  
51 treatment of each patient. Each item is scaled in a 5-points Likert format: 'strongly  
52 agree', 'agree', 'uncertain', 'disagree' and 'strongly disagree'.  
53  
54  
55  
56  
57  
58  
59  
60

- 1  
2  
3 9. Psoriasis Area and Severity Index (PASI): measure of psoriasis severity average to  
4 quantify psoriasis grade [51], combining an assessment of each psoriasis lesion graded  
5 on a 0-4 scale (0=none and 4=maximum) based on three parameters of the lesions  
6 including, erythema (redness), induration (thickness), desquamation (scaliness) and on  
7 a weighted evaluation of the affected area (from 0=affecting 0% to 6=affecting 100%),  
8 dividing the body into four sections: head (10% of person's skin), trunk (30%), upper  
9 extremities (20%) and lower extremities (40%). Each area is scored by itself.  
10  
11  
12  
13  
14  
15  
16  
17  
18  
19 10. Physician Global Assessment (PGA): A 5-point ordinal scale used to assess the severity  
20 of disease over the body including global, scalp, palmoplantar and nails. The scale  
21 ranges from 0 to 4 for global, scalp and palmoplantar assessment [52]:  
22  
23  
24  
25

26 0= clear: no signs of psoriasis

27  
28 1= almost clear: only minimal plaque elevation, scaling, and/or erythema

29  
30 2= mild: slight plaque elevation, scaling, and/or erythema

31  
32 3= moderate: moderate plaque elevation, scaling, and/or erythema

33  
34 4= severe: very marked plaque elevation, scaling, and/or erythema  
35  
36

37 For nails assessment, the scale ranges from 0 to 4:  
38  
39

40 0= none: normal nail appearance

41  
42 1= mild: pitting and/or oil drops; mild disfigurement

43  
44 2= moderate: prominent visible pitting and/or oil drops, distal onycholysis  
45 with/without hyperkeratosis; moderate disfigurement  
46  
47

48  
49 3= severe: pronounced nail changes including pitting, oil drops, distal  
50 onycholysis with/without hyperkeratosis, onychodystrophy; substantial  
51 disfigurement  
52  
53

54  
55 4= very severe: severe distal onycholysis with/without hyperkeratosis and/or  
56 severe onychodystrophy; prominent disfigurement  
57  
58  
59  
60

1  
2  
3 11. Physician's satisfaction: A composite survey with 16 items, 10 of them are generic  
4 items and correspond to the compassion subscale of the Professional Quality of Life  
5 questionnaire [53]; and 6 items were specifically created for this study regarding  
6 biological treatment. There are 5-point scales that reflect how frequently the physician  
7 experienced this thing in the last 30 days.  
8  
9

10  
11  
12  
13  
14 12. Patient's and physician's satisfaction of being part of the study: open question to assess  
15 the satisfaction that the participation on a clinical study may provide to the patients and  
16 physicians.  
17  
18  
19  
20  
21

### 22 **Sample size calculation**

23  
24 A total sample size of 338 patients with baseline WHO-5 score  $\leq 50$  will provide a 95% power  
25 to detect a difference of 10 points [43] in the absolute change from baseline in the WHO-5 total  
26 score at week 24, assuming 50.5 as the standard deviation of the difference. This sample size  
27 of 338 patients produces a two-sided 95% confidence interval with a precision of  $\pm 5.4$  points.  
28  
29

30 A conservative estimation assumes that 75% of the psoriatic population may have a baseline  
31 WHO-5 score  $\leq 50$  [54]. Therefore, around 450 patients will have to be included in the study to  
32 ensure the 338 patients previously described. Also considering a 10% drop out rate, the final  
33 number of patients to be included will be approximately 500.  
34  
35  
36  
37  
38  
39  
40  
41  
42  
43

### 44 **Data analyses and reporting**

45  
46 All data analyses will be performed using SAS<sup>®</sup> version 9.2 or higher (SAS Institute, Cary, NC,  
47 USA). Descriptive analyses will be performed. Statistical analyses will be based on observed  
48 cases. Multiple imputation will be performed as a sensitivity analysis. All AE verbatim terms  
49 will be coded using the Medical Dictionary for Regulatory Activities. Medication will be coded  
50 using WHO Drug Dictionary. Final analyses will be performed once the data from all patients  
51  
52  
53  
54  
55  
56  
57  
58  
59  
60

1  
2  
3 have been collected in the database, cleaned, and database lock has occurred. Analyses will be  
4  
5 performed overall and per country.  
6  
7

8 Changes in WHO-5 (to assess the primary objective) and changes in DLQI-R, PBI-S-10,  
9  
10 TSQM-9, patient's and physician's, and NRS scores will be calculated as the difference  
11  
12 between baseline and follow-up visits (up to 24 months) and will be compared using paired t-  
13  
14 test (or Wilcoxon signed-rank test). Furthermore, all answers will be described by number of  
15  
16 patients who answer in each category or domain (if applicable). To assess the "correlation of  
17  
18 the change of health-related well-being (WHO-5)", a Pearson product-moment correlation  
19  
20 coefficient (r) will be used and, for ordinal data, a Spearman's rank-order correlation will be  
21  
22 used. Work and activity impairment will be analysed using the responses to the WPAI:PSO  
23  
24 questionnaire in patients actively working in the last 7 days. Activity impairment will be  
25  
26 calculated in each study visit. Changes in WPAI:PSO scores will be calculated as the difference  
27  
28 between baseline and follow-up visits (up to 24 months) and will be compared using paired t-  
29  
30 test (or Wilcoxon signed-rank test). FamilyPso questionnaire will be described through each  
31  
32 factor and for total score. For additional outcomes, PASI values will be correlated with the  
33  
34 different clinical questionnaires thorough Pearson correlation (r) in order to assess positive  
35  
36 impact of the control of skin manifestations.  
37  
38  
39  
40  
41  
42  
43

#### 44 **Patient and public involvement statement**

45  
46 Patients or the public were not involved in the design of the study, and will not be involved in  
47  
48 the conduct, reporting, or dissemination plans of this research.  
49  
50  
51  
52  
53  
54  
55  
56  
57  
58  
59  
60



## ETHICS AND DISSEMINATION

This non-interventional study will be conducted in compliance with the protocol, all applicable regulatory requirements of the countries where the study is being conducted and the ethical principles of the latest version of the Declaration of Helsinki that are consistent with Good Pharmacoepidemiology Practices. Data protection and privacy regulations will be strictly observed in capturing, forwarding, processing, and storing patient data according to the Directive 95/46/EC on the protection of individuals and in compliance with the Regulation (EU) 2016/679 of the European Parliament and of the Council of 27 April 2016 on the protection of natural persons with regard to the processing of personal data and on the free movement of such data, and repealing Directive 95/46/EC (General Data Protection Regulation). The protocol has been approved by the following ethics committees: (i) Medizinische Universität Graz - Ethikkommission (Austria, reference number: 33-555 ex 20/21), (ii) Comité d’Ethique hospitalo-facultaire (CEHF) Cliniques universitaires Saint-Luc (Belgium, reference number BC-10914), (iii) Comité de Protection des Personnes Nord-Ouest III (France, reference number: 2021-61), (iv) Medizinische Fakultät der Christian-Albrechts-Universität zu Kiel - Ethik Kommission (Germany, reference number: D 480/21), (v) Comitato Etico Università Federico II (Italy, reference number: 295/21), (vi) CEIC Aragón (CEICA) (Spain, reference number: EPA21/016, Acta 11/2021), (vii) Ethikkommission Nordwest- und Zentralschweiz (EKNZ) (Switzerland, reference number: 2021-01705), (viii) DCRF/NWMO Advisory Commission UMC Groningen (The Netherlands, reference number: NWMO 21.09.035), and (ix) London - Hampstead Research Ethics Committee (UK, reference number: 21/PR/0883).

The results of the POSITIVE study will be disseminated through one or more scientific manuscripts and may also be presented at medical congresses.

## DISCUSSION

The lack of patient-oriented outcome measures for assessing the overall well-being of patients with psoriasis is becoming a concern in dermatology clinical practice and research. Psoriasis heavily affects the physical, psychological and social well-being of patients and that of their family members and partners, thus, beside clinical assessments, the full impact of psoriasis treatment on the patient and people around should be recognised. To our knowledge, the POSITIVE study is the first study to apply the WHO-5 as a primary endpoint to estimate the improvements on patients' well-being treated with tildrakizumab in a real-world setting. This study will measure the well-being of patients, their partners and of physicians, for a better understanding of the impact of psoriasis as a chronic disease on patients' and their close environment. The results of this study could potentially be added to the available psoriasis evaluation methods and provide dermatologists with new tools to improve their own and patient's well-being enhancing patient-clinician relationships. The need to provide results from the POSITIVE study becomes essential given the WHO claim for people-centred healthcare and patient commitment. The POSITIVE study will significantly promote patients' involvement and awareness as recommended by the WHO global report on psoriasis [5], as the most common root for patient dissatisfaction is being poorly engaged in the treatment decision-making process. Limitations of the study will include potential bias and missing information or possible drop-outs or lost to follow-up in the last follow-up visits of the study because of the long observational period. In addition, potential time-related maturation/history effects on the primary outcome measure of general well-being should be considered, especially post-pandemic, given the long observational period and the lack of a control group. Moreover, patients included in this study will have to be preselected to initiate tildrakizumab therapy before patient inclusion in the study. Finally, a limitation could be represented by patient-related bias on self-perception due to the inclusion in a clinical study.

1  
2  
3 In summary, this prospective observation study constitutes an innovative people-centric  
4 approach to investigate how intervention with tildrakizumab may improve the well-being of  
5  
6 patients, their families, and healthcare professionals.  
7  
8  
9  
10  
11  
12  
13  
14  
15  
16  
17  
18  
19  
20  
21  
22  
23  
24  
25  
26  
27  
28  
29  
30  
31  
32  
33  
34  
35  
36  
37  
38  
39  
40  
41  
42  
43  
44  
45  
46  
47  
48  
49  
50  
51  
52  
53  
54  
55  
56  
57  
58  
59  
60

For peer review only

## ETHICS STATEMENT

### Patient consent for publication

Not required.

## ACKNOWLEDGEMENTS

Editorial assistance and writing support were provided by Paula Casajust, MSc and Stefania Ippati, PhD of TFS HealthScience.

## CONTRIBUTORSHIP STATEMENT

**MA, RS, ED, PL, EdJ, GF, LN, AN, JL, ZR, SG, EM, TO, IK, and UM** were involved in conception and study design. **MA, RS, ED, PL, EdJ, GF, LN, AN, JL, ZR, SG, EM, TO, IK, and UM** provided edits, critiqued the manuscript for intellectual content, and approved the final manuscript.

## COMPETING INTERESTS

**MA** has served as consultant for, or has been a paid speaker for clinical trials sponsored by companies that manufacture drugs used for the treatment of psoriasis, including Abbvie, Almirall, Amgen, Biogen, Boehringer Ingelheim, Celgene, Centocor, Eli-Lilly, GSK, Janssen-Cilag, Leo Pharma, Medac, Merck, MSD, Novartis, Pfizer, UCB, and Xenoport; **RS** has been an advisor and/or received speaker honoraria and/or received grants from AbbVie, Almirall, Beiersdorf, Janssen, LEO Pharma and Novartis; **ED** has the following conflict of interests: Advisory Board member, consultant, grants, research support, participation in clinical trials, honorarium for speaking, research support, with the following pharmaceutical companies: Abbvie/Abbott, Almirall, Amgen, Janssen-Cilag, Leo Pharma, Novartis, Pfizer, MSD-Schering-Plough, Celgene, Lilly, and UCB; **PL** received honoraria and/or grants as an investigator, speaker, and/or advisory board member for AbbVie, Almirall, Actelion, Celgene, Janssen, Lilly, Sanofi, Leo, UCB, and Novartis; **EdJ** has received research grants for the independent research fund of the department of dermatology of the Radboud University

1  
2  
3 Medical Center Nijmegen, The Netherlands from AbbVie, Leo Pharma, Janssen  
4  
5 Pharmaceuticals, Novartis, Pfizer, and UCB and has acted as consultant and/or paid speaker for  
6  
7 and/or participated in research sponsored by companies that manufacture drugs used for the  
8  
9 treatment of psoriasis including AbbVie, Almirall, Celgene, Galapagos, Janssen  
10  
11 Pharmaceutica, Leo Pharma, Lilly, Novartis, Sanofi, and UCB. All funding is not personal but  
12  
13 goes to the independent research fund of the department of dermatology of Radboud University  
14  
15 Medical Center Nijmegen (Radboudumc), The Netherlands; **GF** has acted as speaker and  
16  
17 consultant for AbbVie, Almirall, Eli Lilly, Leo Pharma, Janssen, Novartis, and UCB; **LN**  
18  
19 received consultation fees from Abbvie, Amgen, Boehringer Ingelheim, Celgene, Eli Lilly,  
20  
21 IBSA, Menarini, Janssen, Novartis, and Sanofi; **AN** declares being a consultant and advisor  
22  
23 and/or receiving speaking fees and/or grants and/or served as an investigator in clinical trials  
24  
25 for AbbVie, Almirall, Amgen, BMS, Boehringer Ingelheim, Celgene, Eli Lilly, Galderma,  
26  
27 GSK, LEO Pharma, Janssen-Cilag, MSD, Novartis, Pfizer, Sandoz, Sanofi, Serono and UCB;  
28  
29 **JL** has been a speaker/advisor for and her institution received grants from AbbVie, Almirall,  
30  
31 Argenx, BMS, Celgene, Janssen, LEO Pharma, Eli Lilly, Novartis, Pfizer and UCB; **ZR** has  
32  
33 been an advisor, investigator, and/or speaker for Novartis, Janssen-Cilag, Lilly, eo-Pharma,  
34  
35 Celgene, Pfizer, UCB, Amgen, Almirall, MSD, and MEDAC; **SG** has been an advisor and/or  
36  
37 received speakers' honoraria and/or received grants and/or participated in clinical trials of the  
38  
39 following companies: AbbVie, Affibody AB, Akari Therapeutics Plc, Almirall-Hermal,  
40  
41 Amgen, Anaptys Bio, Argenx BV, AstraZeneca AB, Biogen Idec, Bioskin, Boehringer-  
42  
43 Ingelheim, Celgene, Dermira, Eli Lilly, Forward Pharma, Galderma, Hexal AG, Incyte Inc.,  
44  
45 Janssen-Cilag, Johnson & Johnson, Kymab, Leo Pharma, Medac, MSD, Neubourg Skin Care  
46  
47 GmbH, Novartis, Pfizer, Principia Biopharma, Regeneron Pharmaceutical, Sandoz  
48  
49 Biopharmaceuticals, Sanofi-Aventis, Trevi Therapeutics, and UCB Pharma; **EM** and **IK** are  
50  
51 employees of Almirall; **TO** has served as medical advisor for Almirall; **UM** has been an advisor  
52  
53  
54  
55  
56  
57  
58  
59  
60

1  
2  
3 and/or received speakers' honoraria and/or received grants and/or participated in clinical trials  
4  
5 of the following companies: AbbVie, Aditxt, Almirall, Amgen, Aristeia, Boehringer-Ingelheim,  
6  
7 Bristol-Myers Squibb, Celgene, Dr. Reddy's, Eli Lilly, Foamix, Formycon, Immunic, Janssen,  
8  
9 LEO Pharma, Medac, MetrioPharm, Novartis, Phi-Stone, Pierre Fabre, Sanofi-Aventis, and  
10  
11 UCB Pharma.  
12  
13

#### 14 **FUNDING**

15  
16  
17 This work was supported by Almirall, Barcelona, Spain. Award/grant number: N/A.  
18

#### 19 **DATA SHARING STATEMENT**

20  
21 Not applicable.  
22  
23  
24  
25  
26  
27  
28  
29  
30  
31  
32  
33  
34  
35  
36  
37  
38  
39  
40  
41  
42  
43  
44  
45  
46  
47  
48  
49  
50  
51  
52  
53  
54  
55  
56  
57  
58  
59  
60

## REFERENCES

- 1 Mrowietz U, Reich K. Psoriasis--new insights into pathogenesis and treatment. *Dtsch Arztebl Int* 2009;**106**:11–8, quiz 19. doi:10.3238/arztebl.2009.0011
- 2 Bhosle MJ, Kulkarni A, Feldman SR, *et al.* Quality of life in patients with psoriasis. *Health Qual Life Outcomes* 2006;**4**:35. doi:10.1186/1477-7525-4-35
- 3 Eghlileb AM, Davies EEG, Finlay AY. Psoriasis has a major secondary impact on the lives of family members and partners. *Br J Dermatol* 2007;**156**:1245–50. doi:10.1111/j.1365-2133.2007.07881.x
- 4 Villacorta R, Teeple A, Lee S, *et al.* A multinational assessment of work-related productivity loss and indirect costs from a survey of patients with psoriasis. *Br J Dermatol* 2020;**183**:548–58. doi:10.1111/bjd.18798
- 5 Global report on psoriasis. <https://www.who.int/publications-detail-redirect/global-report-on-psoriasis> (accessed 17 Nov 2021).
- 6 Koo J, Marangell L b., Nakamura M, *et al.* Depression and suicidality in psoriasis: review of the literature including the cytokine theory of depression. *J Eur Acad Dermatol Venereol* 2017;**31**:1999–2009. doi:10.1111/jdv.14460
- 7 Sallemi R, Bouhamed M, Masmoudi R, *et al.* Anxiety and depressive symptoms in patients with psoriasis. *Eur Psychiatry* 2021;**64**:S183–4. doi:10.1192/j.eurpsy.2021.485
- 8 Dubertret L, Mrowietz U, Ranki A, *et al.* European patient perspectives on the impact of psoriasis: the EUOPSO patient membership survey. *Br J Dermatol* 2006;**155**:729–36. doi:10.1111/j.1365-2133.2006.07405.x
- 9 Palota T, Szepietowski JC, Pec J, *et al.* A survey of disease severity, quality of life, and treatment patterns of biologically naive patients with psoriasis in central and eastern Europe. *Acta Dermatovenerol Croat* 2010;**18**:151–61.

- 1  
2  
3 10 Naldi L. Scoring and monitoring the severity of psoriasis. What is the preferred method?  
4  
5 What is the ideal method? Is PASI passé? facts and controversies. *Clin Dermatol*  
6  
7 2010;**28**:67–72. doi:10.1016/j.clindermatol.2009.03.001  
8  
9
- 10 11 Korman NJ, Zhao Y, Pike J, *et al.* Relationship between psoriasis severity, clinical  
11  
12 symptoms, quality of life and work productivity among patients in the USA. *Clin Exp*  
13  
14 *Dermatol* 2016;**41**:514–21. doi:10.1111/ced.12841  
15  
16
- 17 12 Berth-Jones J, Grotzinger K, Rainville C, *et al.* A study examining inter- and intrarater  
18  
19 reliability of three scales for measuring severity of psoriasis: Psoriasis Area and Severity  
20  
21 Index, Physician’s Global Assessment and Lattice System Physician’s Global Assessment.  
22  
23 *Br J Dermatol* 2006;**155**:707–13. doi:10.1111/j.1365-2133.2006.07389.x  
24  
25
- 26 13 Puzenat E, Bronsard V, Prey S, *et al.* What are the best outcome measures for assessing  
27  
28 plaque psoriasis severity? A systematic review of the literature. *J Eur Acad Dermatol*  
29  
30 *Venereol* 2010;**24 Suppl 2**:10–6. doi:10.1111/j.1468-3083.2009.03562.x  
31  
32
- 33 14 da Silva MFP, Fortes MRP, Miot LDB, *et al.* Psoriasis: correlation between severity index  
34  
35 (PASI) and quality of life index (DLQI) in patients assessed before and after systemic  
36  
37 treatment. *An Bras Dermatol* 2013;**88**:760–3. doi:10.1590/abd1806-4841.20132052  
38  
39
- 40 15 Twiss J, Meads DM, Preston EP, *et al.* Can We Rely on the Dermatology Life Quality Index  
41  
42 as a Measure of the Impact of Psoriasis or Atopic Dermatitis? *J Invest Dermatol*  
43  
44 2012;**132**:76–84. doi:10.1038/jid.2011.238  
45  
46
- 47 16 Langenbruch A, Radtke MA, Gutknecht M, *et al.* Does the Dermatology Life Quality Index  
48  
49 (DLQI) underestimate the disease-specific burden of psoriasis patients? *J Eur Acad*  
50  
51 *Dermatol Venereol* 2019;**33**:123–7. doi:10.1111/jdv.15226  
52  
53
- 54 17 Ali FM, Johns N, Salek S, *et al.* Correlating the Dermatology Life Quality Index with  
55  
56 psychiatric measures: A systematic review. *Clin Dermatol* 2018;**36**:691–7.  
57  
58 doi:10.1016/j.clindermatol.2018.08.014  
59  
60



- 1  
2  
3 18 Pattinson RL, Trialonis-Suthakharan N, Gupta S, *et al.* Patient-Reported Outcome  
4 Measures in Dermatology: A Systematic Review. *Acta Derm Venereol*  
5 2021;**101**:adv00559. doi:10.2340/00015555-3884  
6  
7  
8  
9  
10 19 Feldman SR, Regnier SA, Chirilov A, *et al.* Patient-reported outcomes are important  
11 elements of psoriasis treatment decision making: A discrete choice experiment survey of  
12 dermatologists in the United States. *J Am Acad Dermatol* 2019;**80**:1650–7.  
13 doi:10.1016/j.jaad.2019.01.039  
14  
15  
16  
17  
18 20 Montenegro H, Ramagem C, Kawar R, *et al.* Making Progress in People-centred Care:  
19 Country Experiences and Lessons Learnt. *Int J Pers Cent Med* 2012;**2**:64–72.  
20 doi:10.5750/ijpcm.v2i1.93  
21  
22  
23  
24  
25 21 Augustin M, Alvaro-Gracia JM, Bagot M, *et al.* A framework for improving the quality of  
26 care for people with psoriasis. *J Eur Acad Dermatol Venereol* 2012;**26 Suppl 4**:1–16.  
27 doi:10.1111/j.1468-3083.2012.04576.x  
28  
29  
30  
31  
32 22 Masson E. Joint AAD-NPF guidelines of care for the management and treatment of  
33 psoriasis with biologics. EM-Consulte. [https://www.em-](https://www.em-consulte.com/article/1281151/joint-aad-npf-guidelines-of-care-for-the-managemen)  
34 [consulte.com/article/1281151/joint-aad-npf-guidelines-of-care-for-the-managemen](https://www.em-consulte.com/article/1281151/joint-aad-npf-guidelines-of-care-for-the-managemen)  
35 (accessed 18 May 2021).  
36  
37  
38  
39  
40  
41  
42 23 Armstrong AW, Puig L, Joshi A, *et al.* Comparison of Biologics and Oral Treatments for  
43 Plaque Psoriasis: A Meta-analysis. *JAMA Dermatol* 2020;**156**:258–69.  
44 doi:10.1001/jamadermatol.2019.4029  
45  
46  
47  
48  
49 24 Langenbruch A, Mohr N, Kirsten N, *et al.* Quality of psoriasis care in Germany - results  
50 from the nationwide health care studies PsoHealth 2004-2017. *J Eur Acad Dermatol*  
51 *Venereol* 2021;**35**:1536–42. doi:10.1111/jdv.17220  
52  
53  
54  
55  
56  
57  
58  
59  
60

- 1  
2  
3 25 Tada Y, Watanabe R, Noma H, *et al.* Short-term effectiveness of biologics in patients with  
4 moderate-to-severe plaque psoriasis: A systematic review and network meta-analysis. *J*  
5  
6 *Dermatol Sci* 2020;**99**:53–61. doi:10.1016/j.jdermsci.2020.06.003  
7  
8  
9  
10 26 Augustin M, Wirth D, Mahlich J, *et al.* Cost per responder analysis of guselkumab versus  
11 targeted therapies in the treatment of moderate to severe plaque psoriasis in Germany. *J*  
12 *Dermatolog Treat* 2020;:1–7. doi:10.1080/09546634.2020.1793891  
13  
14  
15  
16 27 Augustin M, McBride D, Gilloteau I, *et al.* Cost-effectiveness of secukinumab as first  
17 biologic treatment, compared with other biologics, for moderate to severe psoriasis in  
18 Germany. *J Eur Acad Dermatol Venereol* 2018;**32**:2191–9. doi:10.1111/jdv.15047  
19  
20  
21  
22 28 Crowley JJ, Warren RB, Cather JC. Safety of selective IL-23p19 inhibitors for the treatment  
23 of psoriasis. *J Eur Acad Dermatol Venereol* 2019;**33**:1676–84. doi:10.1111/jdv.15653  
24  
25  
26  
27 29 Reich K, Papp KA, Blauvelt A, *et al.* Tildrakizumab versus placebo or etanercept for  
28 chronic plaque psoriasis (reSURFACE 1 and reSURFACE 2): results from two randomised  
29 controlled, phase 3 trials. *Lancet* 2017;**390**:276–88. doi:10.1016/S0140-6736(17)31279-5  
30  
31  
32  
33 30 Imafuku S, Kanai Y, Murotani K, *et al.* Utility of the Dermatology Life Quality Index at  
34 initiation or switching of biologics in real-life Japanese patients with plaque psoriasis:  
35 Results from the ProLOGUE study. *J Dermatol Sci* 2021;**101**:185–93.  
36 doi:10.1016/j.jdermsci.2021.01.002  
37  
38  
39  
40 31 Strober BE, van der Walt JM, Armstrong AW, *et al.* Clinical Goals and Barriers to Effective  
41 Psoriasis Care. *Dermatol Ther (Heidelb)* 2019;**9**:5–18. doi:10.1007/s13555-018-0279-5  
42  
43  
44  
45 32 Fleming P, Bai JW, Pratt M, *et al.* The prevalence of anxiety in patients with psoriasis: a  
46 systematic review of observational studies and clinical trials. *J Eur Acad Dermatol*  
47 *Venereol* 2017;**31**:798–807. doi:10.1111/jdv.13891  
48  
49  
50  
51  
52  
53  
54  
55  
56  
57  
58  
59  
60

- 1  
2  
3 33 Korman AM, Hill D, Alikhan A, *et al.* Impact and management of depression in psoriasis  
4 patients. *Expert Opin Pharmacother* 2016;**17**:147–52.  
5  
6 doi:10.1517/14656566.2016.1128894  
7  
8  
9  
10 34 Rzeszutek M, Podkowa K, Pięta M, *et al.* Comparative study of life satisfaction among  
11 patients with psoriasis versus healthy comparison group: the explanatory role of body image  
12 and resource profiles. *Qual Life Res* 2021;**30**:181–91. doi:10.1007/s11136-020-02621-3  
13  
14  
15  
16 35 Fortune DG, Richards HL, Kirby B, *et al.* Successful treatment of psoriasis improves  
17 psoriasis-specific but not more general aspects of patients' well-being. *Br J Dermatol*  
18 2004;**151**:1219–26. doi:https://doi.org/10.1111/j.1365-2133.2004.06222.x  
19  
20  
21  
22  
23 36 Blome C, Augustin M, Behechtnejad J, *et al.* Dimensions of patient needs in dermatology:  
24 subscales of the patient benefit index. *Arch Dermatol Res* 2011;**303**:11–7.  
25  
26 doi:10.1007/s00403-010-1073-0  
27  
28  
29  
30 37 Blome C, Costanzo A, Dauden E, *et al.* Patient-relevant needs and treatment goals in nail  
31 psoriasis. *Qual Life Res* 2016;**25**:1179–88. doi:10.1007/s11136-015-1136-y  
32  
33  
34  
35 38 da Silva N, Augustin M, Langenbruch A, *et al.* Disease burden and treatment needs of  
36 patients with psoriasis in sexually-sensitive and visible body areas: results from a large-  
37 scale survey in routine care. *Eur J Dermatol* 2020;**30**:267–78. doi:10.1684/ejd.2020.3768  
38  
39  
40  
41 39 da Silva N, Augustin M, Langenbruch A, *et al.* Sex-related impairment and patient  
42 needs/benefits in anogenital psoriasis: Difficult-to-communicate topics and their impact on  
43 patient-centred care. *PLoS One* 2020;**15**:e0235091. doi:10.1371/journal.pone.0235091  
44  
45  
46  
47 40 The World Health Organisation- Five Well-Being Index (WHO-5).  
48  
49 [https://www.corc.uk.net/outcome-experience-measures/the-world-health-organisation-](https://www.corc.uk.net/outcome-experience-measures/the-world-health-organisation-five-well-being-index-who-5/)  
50  
51 [five-well-being-index-who-5/](https://www.corc.uk.net/outcome-experience-measures/the-world-health-organisation-five-well-being-index-who-5/) (accessed 18 May 2021).  
52  
53  
54  
55  
56  
57  
58  
59  
60

- 1  
2  
3 41 Sustainable Development Goals 3 - The Global Action Plan for Healthy Lives and Well-  
4 being for All. <https://www.who.int/initiatives/sdg3-global-action-plan> (accessed 17 Nov  
5 2021).  
6  
7  
8  
9  
10 42 Schuster B, Ziehfreund S, Albrecht H, *et al.* Happiness in dermatology: a holistic evaluation  
11 of the mental burden of skin diseases. *J Eur Acad Dermatol Venereol* 2020;**34**:1331–9.  
12 doi:10.1111/jdv.16146  
13  
14  
15  
16 43 Topp CW, Østergaard SD, Søndergaard S, *et al.* The WHO-5 Well-Being Index: A  
17 Systematic Review of the Literature. *Psychother Psychosom* 2015;**84**:167–76.  
18 doi:10.1159/000376585  
19  
20  
21  
22  
23 44 Mrowietz U, Hartmann A, Weißmann W, *et al.* FamilyPso - a new questionnaire to assess  
24 the impact of psoriasis on partners and family of patients. *J Eur Acad Dermatol Venereol*  
25 2017;**31**:127–34. doi:10.1111/jdv.13872  
26  
27  
28  
29  
30 45 Rencz F, Gulácsi L, Péntek M, *et al.* Proposal of a new scoring formula for the Dermatology  
31 Life Quality Index in psoriasis. *Br J Dermatol* 2018;**179**:1102–8. doi:10.1111/bjd.16927  
32  
33  
34  
35 46 Augustin M, Radtke MA, Zschocke I, *et al.* The patient benefit index: a novel approach in  
36 patient-defined outcomes measurement for skin diseases. *Arch Dermatol Res*  
37 2009;**301**:561–71. doi:10.1007/s00403-009-0928-8  
38  
39  
40  
41  
42 47 Bharmal M, Payne K, Atkinson MJ, *et al.* Validation of an abbreviated Treatment  
43 Satisfaction Questionnaire for Medication (TSQM-9) among patients on antihypertensive  
44 medications. *Health Qual Life Outcomes* 2009;**7**:36. doi:10.1186/1477-7525-7-36  
45  
46  
47  
48 48 Schaarschmidt M-L, Kromer C, Herr R, *et al.* Treatment satisfaction of patients with  
49 psoriasis. *Acta Derm Venereol* 2015;**95**:572–8. doi:10.2340/00015555-2011  
50  
51  
52  
53 49 Wu JJ, Lin C, Sun L, *et al.* Minimal clinically important difference (MCID) for work  
54 productivity and activity impairment (WPAI) questionnaire in psoriasis patients. *J Eur*  
55 *Acad Dermatol Venereol* 2019;**33**:318–24. doi:10.1111/jdv.15098  
56  
57  
58  
59  
60

- 1  
2  
3 50 Kimball AB, Naegeli AN, Edson-Heredia E, *et al.* Psychometric properties of the Itch  
4  
5 Numeric Rating Scale in patients with moderate-to-severe plaque psoriasis. *Br J Dermatol*  
6  
7 2016;**175**:157–62. doi:10.1111/bjd.14464  
8  
9  
10 51 Langley RG, Ellis CN. Evaluating psoriasis with Psoriasis Area and Severity Index,  
11  
12 Psoriasis Global Assessment, and Lattice System Physician’s Global Assessment. *J Am*  
13  
14 *Acad Dermatol* 2004;**51**:563–9. doi:10.1016/j.jaad.2004.04.012  
15  
16  
17 52 Langley RGB, Feldman SR, Nyirady J, *et al.* The 5-point Investigator’s Global Assessment  
18  
19 (IGA) Scale: A modified tool for evaluating plaque psoriasis severity in clinical trials. *J*  
20  
21 *Dermatolog Treat* 2015;**26**:23–31. doi:10.3109/09546634.2013.865009  
22  
23  
24 53 The Professional Quality of Life Scale – 5 (ProQOL). NovoPsych.  
25  
26 2021. [https://novopsych.com.au/assessments/clinician-self-assessment/the-professional-](https://novopsych.com.au/assessments/clinician-self-assessment/the-professional-quality-of-life-scale-5-proqol/)  
27  
28 [quality-of-life-scale-5-proqol/](https://novopsych.com.au/assessments/clinician-self-assessment/the-professional-quality-of-life-scale-5-proqol/) (accessed 17 Nov 2021).  
29  
30  
31 54 Liu L, Li S, Zhao Y, *et al.* Health state utilities and subjective well-being among psoriasis  
32  
33 vulgaris patients in mainland China. *Qual Life Res* 2018;**27**:1323–33. doi:10.1007/s11136-  
34  
35 018-1819-2  
36  
37  
38  
39  
40  
41  
42  
43  
44  
45  
46  
47  
48  
49  
50  
51  
52  
53  
54  
55  
56  
57  
58  
59  
60

1  
2  
3 **FIGURE LEGENDS**  
4

5 **Figure 1.** Study design of the POSITIVE study  
6  
7  
8  
9  
10  
11  
12  
13  
14  
15  
16  
17  
18  
19  
20  
21  
22  
23  
24  
25  
26  
27  
28  
29  
30  
31  
32  
33  
34  
35  
36  
37  
38  
39  
40  
41  
42  
43  
44  
45  
46  
47  
48  
49  
50  
51  
52  
53  
54  
55  
56  
57  
58  
59  
60

For peer review only

1  
2  
3  
4  
5  
6  
7  
8  
9  
10  
11  
12  
13  
14  
15  
16  
17  
18  
19  
20  
21  
22  
23  
24  
25  
26  
27  
28  
29  
30  
31  
32  
33  
34  
35  
36  
37  
38  
39  
40  
41  
42  
43  
44  
45  
46  
47  
48  
49  
50  
51  
52  
53  
54  
55  
56  
57  
58  
59  
60



254x190mm (300 x 300 DPI)

# BMJ Open

## PATIENT-REPORTED WELL-BEING IN VALUE-BASED CARE USING TILDRAKIZUMAB IN A REAL WORLD SETTING: PROTOCOL OF A MULTI-NATIONAL, PHASE IV, 1 COHORT PROSPECTIVE OBSERVATIONAL STUDY (THE POSITIVE STUDY)

|                                 |                                                                                                                                                                                                                                                                                                                                                                                                                                                                                                                                                                                                                                                                                                                                                                                                                                                                                                                                                                                                                                                                                                                                                                                                                                                                                                                                                                                                                                     |
|---------------------------------|-------------------------------------------------------------------------------------------------------------------------------------------------------------------------------------------------------------------------------------------------------------------------------------------------------------------------------------------------------------------------------------------------------------------------------------------------------------------------------------------------------------------------------------------------------------------------------------------------------------------------------------------------------------------------------------------------------------------------------------------------------------------------------------------------------------------------------------------------------------------------------------------------------------------------------------------------------------------------------------------------------------------------------------------------------------------------------------------------------------------------------------------------------------------------------------------------------------------------------------------------------------------------------------------------------------------------------------------------------------------------------------------------------------------------------------|
| Journal:                        | <i>BMJ Open</i>                                                                                                                                                                                                                                                                                                                                                                                                                                                                                                                                                                                                                                                                                                                                                                                                                                                                                                                                                                                                                                                                                                                                                                                                                                                                                                                                                                                                                     |
| Manuscript ID                   | bmjopen-2021-060536.R2                                                                                                                                                                                                                                                                                                                                                                                                                                                                                                                                                                                                                                                                                                                                                                                                                                                                                                                                                                                                                                                                                                                                                                                                                                                                                                                                                                                                              |
| Article Type:                   | Protocol                                                                                                                                                                                                                                                                                                                                                                                                                                                                                                                                                                                                                                                                                                                                                                                                                                                                                                                                                                                                                                                                                                                                                                                                                                                                                                                                                                                                                            |
| Date Submitted by the Author:   | 27-Dec-2022                                                                                                                                                                                                                                                                                                                                                                                                                                                                                                                                                                                                                                                                                                                                                                                                                                                                                                                                                                                                                                                                                                                                                                                                                                                                                                                                                                                                                         |
| Complete List of Authors:       | <p>Augustin, Matthias; University Medical Center Hamburg-Eppendorf, Institute for Health Services Research in Dermatology and Nursing (IVDP)</p> <p>Sommer, Rachel; University Medical Center Hamburg-Eppendorf, Institute for Health Services Research in Dermatology and Nursing (IVDP)</p> <p>Dauden, E.; La Princesa University Hospital, Instituto de Investigación Sanitaria La Princesa (IIS-IP)</p> <p>Laws, Philip; Leeds Teaching Hospitals NHS Trust</p> <p>de Jong, Elke; Radboud University Medical Center (Radboudumc), Department of Dermatology</p> <p>Fabbrocini, Gabriella; University of Naples Federico II, Section of Dermatology, Department of Clinical Medicine and Surgery</p> <p>Naldi, Luigi; San Bortolo Hospital, Division of Dermatology</p> <p>Navarini, Alexander; University Hospital Basel, Department of Dermatology</p> <p>Lambert, Jo; Ghent University Hospital, Department of Dermatology</p> <p>Reguai, Ziad; Polyclinic Courlancy, Department of Dermatology</p> <p>Gerdes, Sascha; University Medical Center Schleswig-Holstein, Campus Kiel, Center for Inflammatory Skin Diseases, Department of Dermatology, Venereology and Allergology</p> <p>Massana, Eric; Almirall GMA</p> <p>Obis, Teresa; Almirall GMA</p> <p>Kasujee, Ismail; Almirall GMA</p> <p>Mrowietz, Ulrich; University Medical Center Schleswig-Holstein, Campus Kiel, Psoriasis-Center, Department of Dermatology</p> |
| <b>Primary Subject Heading</b>: | Patient-centred medicine                                                                                                                                                                                                                                                                                                                                                                                                                                                                                                                                                                                                                                                                                                                                                                                                                                                                                                                                                                                                                                                                                                                                                                                                                                                                                                                                                                                                            |
| Secondary Subject Heading:      | Dermatology                                                                                                                                                                                                                                                                                                                                                                                                                                                                                                                                                                                                                                                                                                                                                                                                                                                                                                                                                                                                                                                                                                                                                                                                                                                                                                                                                                                                                         |
| Keywords:                       | Psoriasis < DERMATOLOGY, THERAPEUTICS, EPIDEMIOLOGY                                                                                                                                                                                                                                                                                                                                                                                                                                                                                                                                                                                                                                                                                                                                                                                                                                                                                                                                                                                                                                                                                                                                                                                                                                                                                                                                                                                 |
|                                 |                                                                                                                                                                                                                                                                                                                                                                                                                                                                                                                                                                                                                                                                                                                                                                                                                                                                                                                                                                                                                                                                                                                                                                                                                                                                                                                                                                                                                                     |



1  
2  
3  
4  
5  
6  
7  
8  
9  
10  
11  
12  
13  
14  
15  
16  
17  
18  
19  
20  
21  
22  
23  
24  
25  
26  
27  
28  
29  
30  
31  
32  
33  
34  
35  
36  
37  
38  
39  
40  
41  
42  
43  
44  
45  
46  
47  
48  
49  
50  
51  
52  
53  
54  
55  
56  
57  
58  
59  
60



1  
2  
3 **PATIENT-REPORTED WELL-BEING IN VALUE-BASED CARE USING**  
4  
5 **TILDRAKIZUMAB IN A REAL-WORLD SETTING: PROTOCOL OF A MULTI-**  
6  
7 **NATIONAL, PHASE IV, 1-COHORT PROSPECTIVE OBSERVATIONAL STUDY**  
8  
9 **(THE POSITIVE STUDY)**  
10  
11

12 Matthias Augustin<sup>1</sup>, Rachel Sommer<sup>1</sup>, Esteban Daudén<sup>2</sup>, Philip Laws<sup>3</sup>, Elke MGJ de Jong<sup>4</sup>,  
13  
14 Gabriella Fabbrocini<sup>5</sup>, Luigi Naldi<sup>6</sup>, Alexander Navarini<sup>7</sup>, Jo Lambert<sup>8</sup>, Ziad Reguiai<sup>9</sup>, Sascha  
15  
16 Gerdes<sup>10</sup>, Eric Massana<sup>11</sup>, Teresa Obis<sup>11</sup>, Ismail Kasujee<sup>11</sup>, and Ulrich Mrowietz<sup>12</sup>  
17  
18

19 <sup>1</sup> *Institute for Health Services Research in Dermatology and Nursing (IVDP), University*  
20 *Medical Center Hamburg-Eppendorf (UKE), Hamburg, Germany.*

21 <sup>2</sup> *La Princesa University Hospital, Instituto de Investigación Sanitaria La Princesa (IIS-IP),*  
22 *Madrid, Spain.*

23 <sup>3</sup> *Leeds Teaching Hospitals NHS Trust, Leeds, the United Kingdom.*

24 <sup>4</sup> *Department of Dermatology, Radboud University Medical Center (Radboudumc), Nijmegen,*  
25 *The Netherlands.*

26 <sup>5</sup> *Section of Dermatology, Department of Clinical Medicine and Surgery, University of Naples*  
27 *Federico II, Naples, Italy.*

28 <sup>6</sup> *Division of Dermatology, San Bortolo Hospital, Vicenza, Italy.*

29 <sup>7</sup> *Department of Dermatology, University Hospital Basel, Basel, Switzerland.*

30 <sup>8</sup> *Department of Dermatology, Ghent University Hospital, Ghent, Belgium.*

31 <sup>9</sup> *Dermatology Department, Polyclinic Courlancy, Reims, France.*

32 <sup>10</sup> *Center for Inflammatory Skin Diseases, Department of Dermatology, Venereology and*  
33 *Allergology, University Medical Center Schleswig-Holstein, Campus Kiel, Kiel, Germany.*

34 <sup>11</sup> *Almirall GMA, Barcelona, Spain.*

35 <sup>12</sup> *Psoriasis-Center, Department of Dermatology, University Medical Center Schleswig-*  
36 *Holstein, Campus Kiel, Kiel, Germany.*  
37  
38  
39

40  
41 **Corresponding author**  
42

43 Prof. Dr. med. Matthias Augustin  
44

45 Director, Institute for Health Services Research in Dermatology and Nursing (IVDP),  
46

47 University Medical Center Hamburg-Eppendorf (UKE)  
48

49 Martinistr. 52, 20246 Hamburg, Germany  
50

51 E-mail: [m.augustin@uke.de](mailto:m.augustin@uke.de)  
52  
53

54  
55 **Word count:** 4,321  
56  
57  
58  
59  
60

## ABSTRACT

**Introduction:** Psoriasis is a chronic inflammatory skin disease that negatively impacts the quality of life of patients and their families. However, the most commonly used decision-making tools in psoriasis, Psoriasis Area and Severity Index (PASI), Physician Global Assessment (PGA) and Dermatology Life Quality Index (DLQI), do not fully capture the impact of psoriasis on patients' lives. In contrast, the well-established 5-item World Health Organization Well-being Index (WHO-5) assesses the subjective psychological well-being of patients. Moreover, while drug innovations became available for psoriasis, data on the impact of these therapies on patients' lives and their closest environment (family, physicians) is limited. This study will assess the effect of tildrakizumab, an interleukin-23p19 inhibitor, on the overall well-being of patients with moderate-to-severe psoriasis. Moreover, the long-term benefit of tildrakizumab on physicians' satisfaction and psoriasis patients' partners' lives will be evaluated.

**Methods and analysis:** This non-interventional, prospective, observational, real-world evidence study will involve multiple sites in Europe and approximately 500 adults with moderate-to-severe psoriasis treated with tildrakizumab. Each patient will be followed for 24 months. The primary endpoint is well-being measured by the WHO-5 questionnaire. Key secondary endpoints include Physician's Satisfaction and partner's quality of life (FamilyPso). Other endpoints will evaluate skin-generic quality of life (DLQI-R), Treatment Satisfaction Questionnaire for Medication (TSQM-9), Treatment-related Patient Benefit Index "Standard", 10 items (PBI-S-10), and work productivity and activity impairment (WPAI). Statistical analyses will be based on observed cases. Multiple imputation will be performed as a sensitivity analysis, and adverse events will be reported.

**Ethics and dissemination:** The study will be conducted according to the protocol, which received ethics committee approval and applicable regulatory requirements of each

1  
2  
3 participating country. The results will be disseminated through scientific publications and  
4  
5 congress presentations.  
6  
7  
8  
9

10 **Registration details:** NCT04823247.  
11  
12  
13  
14  
15  
16  
17  
18  
19  
20  
21  
22  
23  
24  
25  
26  
27  
28  
29  
30  
31  
32  
33  
34  
35  
36  
37  
38  
39  
40  
41  
42  
43  
44  
45  
46  
47  
48  
49  
50  
51  
52  
53  
54  
55  
56  
57  
58  
59  
60

For peer review only

## STRENGTHS AND LIMITATIONS OF THIS STUDY

- First clinical study in dermatology using the patient-reported well-being as the primary endpoint in accordance with the holistic definition of health by the World Health Organization (WHO).
- Innovative secondary endpoints such as physician's well-being, patient-defined benefit assessment and patients' partner well-being, following a people-centred approach claimed by the WHO, for a better understanding of the impact of a chronic disease such as psoriasis both on patients and their close environment.
- Relevant sample size.
- Patients may experience a biased self-perception of well-being due to their inclusion in a clinical study.
- Potential drop-outs or losses to follow-up due to the long observational period.

## INTRODUCTION

Psoriasis is an immune-mediated, chronic relapsing inflammatory condition characterised by abnormal differentiation and proliferation of the epidermis affecting skin, nails, and joints [1]. The severity of psoriasis is profound as it includes physical and psychological components [2]. Increasing evidence suggest that psoriasis considerably affects the overall well-being of patients and their families [3], as well as their personal, social, and occupational life [4], often resulting in psychological distress and depression [5–7]. A Europe-wide survey examining quality of life reported that almost 77% of patients believed psoriasis negatively affected normal daily activities and well-being [8]. Moreover, a more recent survey showed that psoriasis patients generally report poor quality of life and physicians are often also not satisfied with their patients' treatment [9]. These studies highlight the need for a well-being evaluation strategy besides the available psoriasis severity scoring assessments [10]. Patient-reported outcomes (PROs) are being used with increasing frequency in clinical trials and provide valuable information on how psoriasis affects physical, social, and psychological aspects of patients' lives. However, the most commonly used decision-making tools in psoriasis, the clinician-reported Psoriasis Area Severity Index (PASI), Physician Global Assessment (PGA) and the patient-reported Dermatology Life Quality Index (DLQI), do not take into account the entire patient disease perspective, leading to misaligned perception between physicians and patients [11]. While the PASI and PGA track changes in psoriasis severity from a clinician's perspective [12,13], the skin-generic DLQI has been used to evaluate psoriasis symptoms and their impact on quality of life [14]. However, the use of the DLQI has been associated with several measurement problems related to age, gender difference, inadequate power to differentiate patients with mild illness, and underestimating patient's emotional status [15,16]. Furthermore, being a sum score and permitting to rate "not relevant" in 8 out of 10 items, DLQI has been shown to provide marked bias and to underestimate the burden of very severely affected

1  
2  
3 patients[16]. Moreover, a systematic review on skin conditions has highlighted the critical need  
4  
5 for psychiatric assessments in addition to the DLQI score for a full assessment of patient  
6  
7  
8  
9  
10  
11  
12  
13  
14  
15  
16  
17  
18  
19  
20  
21  
22  
23  
24  
25  
26  
27  
28  
29  
30  
31  
32  
33  
34  
35  
36  
37  
38  
39  
40  
41  
42  
43  
44  
45  
46  
47  
48  
49  
50  
51  
52  
53  
54  
55  
56  
57  
58  
59  
60

patients[16]. Moreover, a systematic review on skin conditions has highlighted the critical need for psychiatric assessments in addition to the DLQI score for a full assessment of patient psychological well-being [17,18].

### **Unmet needs at the time of biologics**

Studies have indicated that a patient-oriented evaluation is critical for overall symptom assessment as physicians' indicators alone cannot capture the disease burden of psoriasis [19–21]. The advent of biologics as monotherapy or in combination with other topical or systemic medications significantly changed the treatment approach for psoriasis representing an advancement over topical treatments or traditional immunosuppressive therapies [22–24]. Biologics target specific components of the immune system and have shown a high benefit-to-risk ratio, high efficacy and acceptable safety profiles [25]. Further, more advanced biologics have been shown to be more cost-effective than first-generation drugs [26,27]. Monoclonal antibodies, selective for the interleukin (IL)-23p19 subunit inhibition, represent a new standard of treatment currently available for the long-term management of psoriasis [28]. Among these, tildrakizumab has demonstrated long-term efficacy and safety in the pivotal phase III studies (reSURFACE 1 and 2) comparing tildrakizumab versus placebo or etanercept for moderate-to-severe psoriasis [29]. However, while biologics are becoming a more important treatment option for individuals with psoriasis, current therapy goals and PROs in dermatology do not fully capture the impact of this therapy on patients' and physicians' well-being [30,31]. Moreover, although several studies have shown that psoriasis significantly affects mental health [32,33], standard severity scores have been found to be very weakly associated with the overall well-being of these patients [34,35]. In practice, there is high need to translate patient burden to patients needs and then derive patient goals conjointly with the patient. Thus, understanding the needs and expectations of patients beyond measuring burden constitutes a fundamental part

1  
2  
3 of treatment in psoriasis [36]. This is particularly important in sensitive conditions such as nail  
4 and anogenital affections [37–39].  
5  
6  
7

### 8 **Well-being in psoriasis: clinical goals**

9  
10 Insights on the well-being of the patients are based on the patient’s view of their condition, and  
11 this concept is increasingly being embraced as a more comprehensive outcome in line with a  
12 holistic view and people-centred perspective, but still undervalued in traditional PROs. Well-  
13 being is a holistic multifaceted concept that in a study context describes “to what extent patients  
14 will get their healthy lives back”, where mental, physical, and social functioning are  
15 interdependent [40]. According to the World Health Organisation (WHO), the ultimate goal of  
16 therapy in chronic diseases such as psoriasis is achieving well-being [41]. Nevertheless, well-  
17 being has been rarely measured in dermatology so far. A recent study concluded that the DLQI  
18 primarily measures physical impairment associated with negative emotions and, thus, provides  
19 only a limited evaluation of well-being [42]. Therefore, assessing well-being or specific  
20 dimensions of well-being can contribute to a holistic evaluation of patients’ health in  
21 accordance with the WHO’s holistic definition.  
22  
23  
24  
25  
26  
27  
28  
29  
30  
31  
32  
33  
34  
35  
36  
37  
38

### 39 **Innovative endpoints in this study**

40  
41 To assess patient well-being, this study will apply the 5-item WHO Well-being Index (WHO-  
42 5), a widely used questionnaire assessing psychological health-related well-being in a variety  
43 of chronic diseases such as diabetes, cardiovascular disease, cancer, and depression [43]. For  
44 the first time, WHO-5 will be used as a primary endpoint in patients with psoriasis to investigate  
45 the improvements that tildrakizumab can achieve on patients’ well-being in a real-world setting.  
46 Moreover, building a positive cross-talk environment between healthcare professionals and  
47 patients is critical. A meta-analysis study including 400 publications reported a higher quality  
48 of life and overall improved treatment outcome when patients had higher trust in their physician  
49  
50  
51  
52  
53  
54  
55  
56  
57  
58  
59  
60



1  
2  
3 [21], underlining how physician's well-being is essential as it can improve patients' satisfaction  
4 and interpersonal aspects of care [22]. Patient's behaviour, in turn, can affect physicians' well-  
5 being, including unrealistic expectations, aggression, or by developing family-like  
6 relationships, resulting in emotional detachment and burnout [23]. As there is no complete  
7 correlation between patient- and physician-reported outcome measures, both PROs and  
8 physician-reported scores should be considered when assessing treatment outcomes [24]. In this  
9 study, the 'Physician's satisfaction' score will be exploited as an innovative tool to investigate  
10 the impact of the psoriasis treatment process on physicians' well-being. Furthermore,  
11 information on the impact of psoriasis on patients' families, particularly partners, is also  
12 lacking, even though the impact of skin disease on family members or partners of patients  
13 should be measured while evaluating the burden of psoriasis [3]. Thus, this study will include  
14 the questionnaire FamilyPso [44], enabling physicians to better understand the impact of  
15 psoriasis as a lifelong chronic disease on partners. This study will provide novel insights into  
16 the dimensions of patients' perspectives and their overall state of well-being using a holistic  
17 patient-partner and physicians-centred approach. The current study is designed to investigate  
18 patient-reported well-being using tildrakizumab in a real-world setting, as well as the impact  
19 on their closing environment, including partners and physicians, to provide a more  
20 comprehensive overview of people-centred healthcare and their overall state of well-being.  
21  
22  
23  
24  
25  
26  
27  
28  
29  
30  
31  
32  
33  
34  
35  
36  
37  
38  
39  
40  
41  
42  
43  
44  
45  
46  
47  
48  
49  
50  
51  
52  
53  
54  
55  
56  
57  
58  
59  
60

## METHODS AND ANALYSIS

The primary objective is to assess the effect of tildrakizumab on the overall well-being in patients with moderate-to-severe psoriasis using the WHO-5 questionnaire. Secondary objectives include: to evaluate the long-term benefit of tildrakizumab on physician's satisfaction (Physician's Satisfaction Questionnaire) and the impact of psoriasis on patients' partners (FamilyPso questionnaire); to assess the long-term benefit of tildrakizumab reported by patients in terms of skin-generic quality of life (DLQI-R), treatment satisfaction (TSQM-9) and treatment-related benefits (PBI-S-10), work impairment due to psoriasis (WPAI:PSO) and extent of the skin manifestations on the entire body using a "heat map" in a subgroup of patients; to correlate the change of WHO-5 with patients' health-related quality of life (HRQoL) and patients' treatment benefits; to assess the control of skin manifestations (absolute PASI) and its impact on patients, physician's satisfaction and on partners of patients; to describe the socio-demographic and clinical profile of the patients being treated with tildrakizumab, according to the routine clinical practice; and to assess the safety and tolerability of tildrakizumab in a real-world setting. Exploratory objectives are to assess the impact of tildrakizumab on PGA of the skin manifestations and to assess the concordance between patients and physician's satisfaction regarding response to the treatment with tildrakizumab.

### Study design

This is an ethics-approved, multi-national, phase IV, 1-cohort prospective observational study planned to be conducted in several countries (Austria, Belgium, France, Germany, Italy, Spain, Switzerland, The Netherlands, and United Kingdom [UK]) to assess patient-reported well-being using tildrakizumab in a live setting. The study design is summarised in **Figure 1**.

### Study population

The study population will comprise a minimum of 338 patients with moderate-to-severe plaque psoriasis who need systemic biologic therapy and qualify for treatment with an IL-23p19 inhibitor in real-world clinical practice. Consecutive patients satisfying all the inclusion criteria and none of the exclusion criteria shown in **Table 1** to be eligible for participation will be offered participation. Recruitment will be competitive across all countries participating in the study (i.e., no fixed number of patients per country).

**Table 1.** Eligibility criteria

| <b>Inclusion criteria</b> |                                                                                                                                                                                                         |
|---------------------------|---------------------------------------------------------------------------------------------------------------------------------------------------------------------------------------------------------|
| 1                         | Patient with diagnosis of moderate-to-severe chronic plaque psoriasis documented in the medical chart.                                                                                                  |
| 2                         | Patient who needs systemic biologic therapy and qualifies for treatment with an IL-23p19 inhibitor. Tildrakizumab must be the anti-IL-23p19 selected therapy before including the patient in the study. |
| 3                         | Patient aged 18 years or older at the time of patient recruitment.                                                                                                                                      |
| 4                         | Patient who has provided written informed consent (if required by country regulations).                                                                                                                 |
| <b>Exclusion criteria</b> |                                                                                                                                                                                                         |
| 1                         | Patients unable to comply with the requirements of the study or who, in the opinion of the study physician, should not participate in the study.                                                        |
| 2                         | Patients included in a clinical trial.                                                                                                                                                                  |

IL, interleukin.

## Endpoints

Study endpoints cover outcomes reported by patients, their partners, and physicians. The primary endpoint is to assess the overall health-related well-being (evaluated through WHO-5 questionnaire) in patients treated with tildrakizumab according to the marketing authorization and routine clinical practice at the long-term. The secondary endpoints are: physicians' satisfaction evaluation through a composite survey with 16 items (10 generic professional quality of life items and 6 items related to the biological treatment); partner well-being evaluation through the FamilyPso questionnaire; patient's perspective on tildrakizumab long-term benefit evaluation through the (i) skin-generic quality of life questionnaire (DLQI-R), (ii) Treatment Satisfaction Questionnaire for Medication (TSQM-9), (iii) Treatment-related Patient

Benefit Index “Standard”, 10 items (PBI-S-10), (iv) Work Productivity and Activity Impairment Questionnaire: Psoriasis (WPAI:PSO), (v) skin manifestations distribution (heat map/patient’s grid in a subgroup of patients) according to location and total percentage of area affected, and (vi) the Numeric Rating Scale (NRS) for itch, pain, joint pain, and fatigue assessments; disease control evaluated through the absolute PASI; description of the sociodemographic (age, gender, educational and working status, etc.) and clinical (location of moderate-to-severe psoriasis, comorbid disease, laboratory tests, etc.) characteristics; adverse events (AE) reported during the use of tildrakizumab. The exploratory endpoints are: the control of the skin manifestation evaluation through the PGA; Patient’s and physician’s opinion about tildrakizumab treatment in relation to the therapeutic objectives’ evaluation through the Patient’s and physician’s questionnaire (**Table 2**).

**Table 2.** Endpoints of the study

|                              | <b>Patient reported outcomes</b>                                                                                                                                                                                | <b>Partners reported outcomes</b> | <b>Physician reported outcomes</b>            | <b>Patient and physician reported outcomes</b> |
|------------------------------|-----------------------------------------------------------------------------------------------------------------------------------------------------------------------------------------------------------------|-----------------------------------|-----------------------------------------------|------------------------------------------------|
| <b>Primary endpoint</b>      | - WHO-5                                                                                                                                                                                                         |                                   |                                               |                                                |
| <b>Secondary endpoint</b>    | - DLQI-R<br>- TSQM-9<br>- PBI-S-10<br>- WPAI: PSO<br>- Patient grid<br>- NRS (itch, pain, joint pain, fatigue assessments)<br>- Sociodemographic and clinical characteristics<br>- AEs during tildrakizumab use | - FamilyPso                       | - Physicians’ satisfaction<br>- Absolute PASI |                                                |
| <b>Exploratory endpoints</b> |                                                                                                                                                                                                                 |                                   | - PGA                                         | - Patient’s and physician’s questionnaire      |

|  |  |  |  |                                                                     |
|--|--|--|--|---------------------------------------------------------------------|
|  |  |  |  | - Patient's and physician's satisfaction of being part of the study |
|--|--|--|--|---------------------------------------------------------------------|

AE, adverse event; DLQI-R, Dermatology Life Quality Index-Revised; NRS, Numeric Rating Scale; PASI, Psoriasis Area Severity Index; PBI-S-10, Patient Benefit Index "Standard", 10 items short form; PGA, Physician Global Assessment; TSQM-9, Treatment Satisfaction Questionnaire for Medication; WHO-5, World Health Organization-Five Well-being Index; WPAI:PSO, Work Productivity and Activity Impairment Questionnaire: Psoriasis.

### Data sources and collection

All data will be collected prospectively from the medical charts and entered directly into the electronic data capture system. The study will include both variables extracted from the medical chart and obtained directly from the patients. No visits or examinations, laboratory tests, or procedures are mandated or recommended as part of this study. The data collection schedule is shown in **Table 3**.

**Table 3.** Data collection schedule

|                                                                                    | Baseline visit | Follow-up visit (at 16 and 28 weeks, 12 and 18 months after baseline visit) | Final visit (24 months from baseline) | Early termination visit |
|------------------------------------------------------------------------------------|----------------|-----------------------------------------------------------------------------|---------------------------------------|-------------------------|
| Patient characteristics and demographics (including date of ICF signature)         | X              |                                                                             | X <sup>a</sup>                        | X <sup>a</sup>          |
| Disease characteristics (diagnosis date, type of psoriasis, severity of psoriasis) | X              |                                                                             |                                       |                         |
| Laboratory test (if it is available)                                               | X              | X                                                                           | X                                     | X                       |
| Comorbidities                                                                      | X              | X                                                                           | X                                     | X                       |
| Concomitant medication                                                             | X              | X                                                                           | X                                     | X                       |
| Drug therapy history                                                               | X              |                                                                             |                                       |                         |
| Tildrakizumab drug therapy (dose)                                                  | X              | X                                                                           | X                                     | X                       |
| PASI                                                                               | X              | X                                                                           | X                                     | X                       |

|                                                                                         | Baseline visit | Follow-up visit (at 16 and 28 weeks, 12 and 18 months after baseline visit) | Final visit (24 months from baseline) | Early termination visit |
|-----------------------------------------------------------------------------------------|----------------|-----------------------------------------------------------------------------|---------------------------------------|-------------------------|
| Heat map/patient's grid (subgroup of patients): location of skin manifestations         | X              | X                                                                           | X                                     | X                       |
| Adverse event reporting                                                                 | X              | X                                                                           | X                                     | X                       |
| <b>Questionnaires</b>                                                                   |                |                                                                             |                                       |                         |
| WHO-5                                                                                   | X              | X                                                                           | X                                     | X                       |
| DLQI-R                                                                                  | X              | X                                                                           | X                                     | X                       |
| PBI-S-10                                                                                | X              | X                                                                           | X                                     | X                       |
| TSQM-9                                                                                  | X              | X                                                                           | X                                     | X                       |
| WPAI:PSO                                                                                | X              | X                                                                           | X                                     | X                       |
| FamilyPso                                                                               | X              | X                                                                           | X                                     | X                       |
| NRS (itch, pain, joint pain, fatigue)                                                   | X              | X                                                                           | X                                     | X                       |
| Patient's and Physician's satisfaction of being part in the study (open field question) | X              |                                                                             | X                                     | X                       |
| PGA                                                                                     | X              | X                                                                           | X                                     | X                       |
| Physician's satisfaction                                                                | X              | X                                                                           | X                                     | X                       |
| Patient's and physician's questionnaire                                                 |                | X                                                                           | X                                     | X                       |

DLQI-R, Dermatology Life Quality Index-Revised; ICF, informed consent form; NRS, Numeric Rating Scale; PASI, Psoriasis Area Severity Index; PBI-S-10, Patient Benefit Index "Standard", 10 items short form; PGA, Physician Global Assessment; TSQM-9, Treatment Satisfaction Questionnaire for Medication ;WHO-5, World Health Organization-Five Well-being Index; WPAI:PSO, Work Productivity and Activity Impairment Questionnaire: Psoriasis; a, Variables such as gender or height will not be collected at these visits.

## Questionnaires

All the questionnaires included in the study have validated translations according to international guidelines from the original language to the official languages in the participating countries.

### Primary endpoint:

1. The 5-item World Health Organization Well-being Index (WHO-5): The WHO-5 is a generic global rating scale measuring subjective well-being containing positive statements. The respondent is asked to rate how well each of the 5 items applies to him

1  
2  
3 or her when considering the last 14 days. Each of the 5 items is scored from 5 (all of the  
4 time) to 0 (none of the time). The raw score therefore theoretically ranges from 0  
5 (absence of well-being) to 25 (maximal well-being). To standardize the score on a scale  
6 from 0 (absent) to 100 (maximal), it is recommended to multiply the raw score by 4  
7 [43].  
8  
9

### 14 **Secondary endpoints:**

- 16
- 17 2. Dermatology Life Quality Index-Relevant (DLQI-R): The DLQI-R is a recently  
18 developed scoring that adjusts the total score of the questionnaire for the number of 'not  
19 relevant' responses indicated by a patient. It is a self-administrated questionnaire  
20 validated as a dermatology-specific quality of life instrument. It includes 10 items to  
21 assess patient's HRQoL during the previous week on a 4-point scale, indicating 'not at  
22 all', 'a little', 'a lot' and 'very much', respectively. For each patient, the DLQI-R score  
23 is estimated as a sum score of the original DLQI score replacing items rated "not  
24 relevant" by the mean of the other items [45].  
25  
26
  - 27 3. Patient Benefit Index "Standard", 10-item short form (PBI-S-10: 10 items describing  
28 treatment goals of patients with skin diseases. Before treatment, these goals are rated on  
29 a 5-point Likert-scale (0="not at all", 4="very") according to their perceived relevance  
30 (PNQ). Alternatively, patients can state that a goal "does not apply" to them. In the  
31 course of treatment, patients are asked to express the achievement of these 10 treatment  
32 goals (treatment benefit) on the same 5-point Likert-scale (PBQ), again with the  
33 opportunity to state that the goal did not apply [46]. An overall index of patient benefits  
34 (PBI) is calculated by adding the single weighted benefits to a sum score reaching from  
35 0=no patient benefit to 4=very strong patient benefit.  
36  
37
  - 38 4. Treatment Satisfaction Questionnaire for Medication (TSQM-9): It is a self-  
39 administrated questionnaire that measures patients' drug therapy satisfaction  
40  
41  
42  
43  
44  
45  
46  
47  
48  
49  
50  
51  
52  
53  
54  
55  
56  
57  
58  
59  
60

1  
2  
3 considering the last two or three weeks or since the last time the patient took the  
4 medication. It consists of 9 statements distributed in 3 domains: efficacy (3 items),  
5 convenience (3 items) and global satisfaction (3 items). Responses are measured on a  
6 Likert scale of 5 or 7 points [47,48].  
7  
8  
9

- 10  
11  
12 5. Work Productivity and Activity Impairment Questionnaire: Psoriasis (WPAI: PSO): It  
13 is a self-administrated questionnaire that measures the impact on the work productivity  
14 in patients with psoriasis considering the last seven days. The questionnaire contains 6  
15 items with dichotomous response options [49].  
16  
17 6. Numeric Rating Scale (NRS) (itch, pain, joint pain, fatigue): It is a self-administrated  
18 questionnaire to assess patients' itch severity, pain, joint pain and fatigue. The  
19 questionnaire has a single-item that describes the worst level of itching, joint pain and  
20 fatigue, respectively, due to psoriasis in the past 24 hours [50].  
21  
22 7. FamilyPso: It is a self-administrated questionnaire to assess the burden on partners of  
23 patients with psoriasis. The questionnaire has 15 items divided in 5 factors: 1) Perceived  
24 strain by social reactions to the partner's psoriasis; 2) Strain caused by cleaning; 3)  
25 Acute emotional strain attributed directly to the psoriasis; 4) Restrictions of social life;  
26 5) General emotional strain. The items are scaled in a 5-point Likert format: 0='not  
27 true', 1='somewhat true', 2='moderately true', 3='quite true', 4='very true', with the  
28 supplementary option 'does not apply to me' [44].  
29  
30 8. Patient's and physician's questionnaire: Survey of 10 questions elaborated for this  
31 project with the objective to assess the opinion of physicians and patients about  
32 tildrakizumab treatment in relation to the therapeutic objectives. The physician will  
33 respond according to his/her assessment in relation to the response to tildrakizumab  
34 treatment of each patient. Each item is scaled in a 5-points Likert format: 'strongly  
35 agree', 'agree', 'uncertain', 'disagree' and 'strongly disagree'.  
36  
37  
38  
39  
40  
41  
42  
43  
44  
45  
46  
47  
48  
49  
50  
51  
52  
53  
54  
55  
56  
57  
58  
59  
60



- 1  
2  
3 9. Psoriasis Area and Severity Index (PASI): measure of psoriasis severity average to  
4 quantify psoriasis grade [51], combining an assessment of each psoriasis lesion graded  
5 on a 0-4 scale (0=none and 4=maximum) based on three parameters of the lesions  
6 including, erythema (redness), induration (thickness), desquamation (scaliness) and on  
7 a weighted evaluation of the affected area (from 0=affecting 0% to 6=affecting 100%),  
8 dividing the body into four sections: head (10% of person's skin), trunk (30%), upper  
9 extremities (20%) and lower extremities (40%). Each area is scored by itself.  
10  
11  
12  
13  
14  
15  
16  
17  
18  
19 10. Physician Global Assessment (PGA): A 5-point ordinal scale used to assess the severity  
20 of disease over the body including global, scalp, palmoplantar and nails. The scale  
21 ranges from 0 to 4 for global, scalp and palmoplantar assessment [52]:  
22  
23  
24  
25

26 0= clear: no signs of psoriasis

27  
28 1= almost clear: only minimal plaque elevation, scaling, and/or erythema

29  
30 2= mild: slight plaque elevation, scaling, and/or erythema

31  
32 3= moderate: moderate plaque elevation, scaling, and/or erythema

33  
34 4= severe: very marked plaque elevation, scaling, and/or erythema  
35  
36

37 For nails assessment, the scale ranges from 0 to 4:  
38  
39

40 0= none: normal nail appearance

41  
42 1= mild: pitting and/or oil drops; mild disfigurement

43  
44 2= moderate: prominent visible pitting and/or oil drops, distal onycholysis  
45 with/without hyperkeratosis; moderate disfigurement  
46  
47

48  
49 3= severe: pronounced nail changes including pitting, oil drops, distal  
50 onycholysis with/without hyperkeratosis, onychodystrophy; substantial  
51 disfigurement  
52  
53

54  
55 4= very severe: severe distal onycholysis with/without hyperkeratosis and/or  
56 severe onychodystrophy; prominent disfigurement  
57  
58  
59  
60

1  
2  
3 11. Physician's satisfaction: A composite survey with 16 items, 10 of them are generic  
4 items and correspond to the compassion subscale of the Professional Quality of Life  
5 questionnaire [53]; and 6 items were specifically created for this study regarding  
6 biological treatment. There are 5-point scales that reflect how frequently the physician  
7 experienced this thing in the last 30 days.  
8  
9

10  
11  
12  
13  
14 12. Patient's and physician's satisfaction of being part of the study: open question to assess  
15 the satisfaction that the participation on a clinical study may provide to the patients and  
16 physicians.  
17  
18  
19  
20  
21

### 22 **Sample size calculation**

23  
24 A total sample size of 338 patients with baseline WHO-5 score  $\leq 50$  will provide a 95% power  
25 to detect a difference of 10 points [43] in the absolute change from baseline in the WHO-5 total  
26 score at week 24, assuming 50.5 as the standard deviation of the difference. This sample size  
27 of 338 patients produces a two-sided 95% confidence interval with a precision of  $\pm 5.4$  points.  
28  
29

30 A conservative estimation assumes that 75% of the psoriatic population may have a baseline  
31 WHO-5 score  $\leq 50$  [54]. Therefore, around 450 patients will have to be included in the study to  
32 ensure the 338 patients previously described. Also considering a 10% drop out rate, the final  
33 number of patients to be included will be approximately 500.  
34  
35  
36  
37  
38  
39  
40  
41  
42  
43

### 44 **Data analyses and reporting**

45  
46 All data analyses will be performed using SAS<sup>®</sup> version 9.2 or higher (SAS Institute, Cary, NC,  
47 USA). Descriptive analyses will be performed. Statistical analyses will be based on observed  
48 cases. Multiple imputation will be performed as a sensitivity analysis. All AE verbatim terms  
49 will be coded using the Medical Dictionary for Regulatory Activities. Medication will be coded  
50 using WHO Drug Dictionary. Final analyses will be performed once the data from all patients  
51  
52  
53  
54  
55  
56  
57  
58  
59  
60

1  
2  
3 have been collected in the database, cleaned, and database lock has occurred. Analyses will be  
4  
5 performed overall and per country.  
6  
7

8 Changes in WHO-5 (to assess the primary objective) and changes in DLQI-R, PBI-S-10,  
9  
10 TSQM-9, patient's and physician's, and NRS scores will be calculated as the difference  
11  
12 between baseline and follow-up visits (up to 24 months) and will be compared using paired t-  
13  
14 test (or Wilcoxon signed-rank test). Furthermore, all answers will be described by number of  
15  
16 patients who answer in each category or domain (if applicable). To assess the "correlation of  
17  
18 the change of health-related well-being (WHO-5)", a Pearson product-moment correlation  
19  
20 coefficient (r) will be used and, for ordinal data, a Spearman's rank-order correlation will be  
21  
22 used. Work and activity impairment will be analysed using the responses to the WPAI:PSO  
23  
24 questionnaire in patients actively working in the last 7 days. Activity impairment will be  
25  
26 calculated in each study visit. Changes in WPAI:PSO scores will be calculated as the difference  
27  
28 between baseline and follow-up visits (up to 24 months) and will be compared using paired t-  
29  
30 test (or Wilcoxon signed-rank test). FamilyPso questionnaire will be described through each  
31  
32 factor and for total score. For additional outcomes, PASI values will be correlated with the  
33  
34 different clinical questionnaires through Pearson correlation (r) in order to assess positive  
35  
36 impact of the control of skin manifestations.  
37  
38  
39  
40  
41  
42  
43

#### 44 **Patient and public involvement statement**

45  
46 Patients or the public were not involved in the design of the study, and will not be involved in  
47  
48 the conduct, reporting, or dissemination plans of this research.  
49  
50  
51  
52  
53  
54  
55  
56  
57  
58  
59  
60

## ETHICS AND DISSEMINATION

This non-interventional study will be conducted in compliance with the protocol, all applicable regulatory requirements of the countries where the study is being conducted and the ethical principles of the latest version of the Declaration of Helsinki that are consistent with Good Pharmacoepidemiology Practices. Data protection and privacy regulations will be strictly observed in capturing, forwarding, processing, and storing patient data according to the Directive 95/46/EC on the protection of individuals and in compliance with the Regulation (EU) 2016/679 of the European Parliament and of the Council of 27 April 2016 on the protection of natural persons with regard to the processing of personal data and on the free movement of such data, and repealing Directive 95/46/EC (General Data Protection Regulation). The protocol has been approved by the following ethics committees: (i) Medizinische Universität Graz - Ethikkommission (Austria, reference number: 33-555 ex 20/21), (ii) Comité d’Ethique hospitalo-facultaire (CEHF) Cliniques universitaires Saint-Luc (Belgium, reference number BC-10914), (iii) Comité de Protection des Personnes Nord-Ouest III (France, reference number: 2021-61), (iv) Medizinische Fakultät der Christian-Albrechts-Universität zu Kiel - Ethik Kommission (Germany, reference number: D 480/21), (v) Comitato Etico Università Federico II (Italy, reference number: 295/21), (vi) CEIC Aragón (CEICA) (Spain, reference number: EPA21/016, Acta 11/2021), (vii) Ethikkommission Nordwest- und Zentralschweiz (EKNZ) (Switzerland, reference number: 2021-01705), (viii) DCRF/NWMO Advisory Commission UMC Groningen (The Netherlands, reference number: NWMO 21.09.035), and (ix) London - Hampstead Research Ethics Committee (UK, reference number: 21/PR/0883).

The results of the POSITIVE study will be disseminated through one or more scientific manuscripts and may also be presented at medical congresses.

## DISCUSSION

The lack of patient-oriented outcome measures for assessing the overall well-being of patients with psoriasis is becoming a concern in dermatology clinical practice and research. Psoriasis heavily affects the physical, psychological and social well-being of patients and that of their family members and partners, thus, beside clinical assessments, the full impact of psoriasis treatment on the patient and people around should be recognised. To our knowledge, the POSITIVE study is the first study to apply the WHO-5 as a primary endpoint to estimate the improvements on patients' well-being treated with tildrakizumab in a real-world setting. This study will measure the well-being of patients, their partners and of physicians, for a better understanding of the impact of psoriasis as a chronic disease on patients and their close environment. The results of this study could potentially be added to the available psoriasis evaluation methods and provide dermatologists with new tools to improve their own and patient's well-being enhancing patient-clinician relationships. The need to provide results from the POSITIVE study becomes essential given the WHO claim for people-centred healthcare and patient commitment. The POSITIVE study will significantly promote patients' involvement and awareness as recommended by the WHO global report on psoriasis [5], as the most common root for patient dissatisfaction is being poorly engaged in the treatment decision-making process. Limitations of the study will include potential bias and missing information or possible drop-outs or lost to follow-up in the last follow-up visits of the study because of the long observational period. In addition, potential time-related maturation/history effects on the primary outcome measure of general well-being should be considered, especially post-pandemic, given the long observational period and the lack of a control group. Moreover, patients included in this study will have to be preselected to initiate tildrakizumab therapy before patient inclusion in the study. Finally, a limitation could be represented by patient-related bias on self-perception of well-being due to the inclusion in a clinical study.

1  
2  
3 In summary, this prospective observation study constitutes an innovative people-centric  
4 approach to investigate how intervention with tildrakizumab may improve the well-being of  
5  
6 patients, their families, and healthcare professionals.  
7  
8  
9  
10  
11  
12  
13  
14  
15  
16  
17  
18  
19  
20  
21  
22  
23  
24  
25  
26  
27  
28  
29  
30  
31  
32  
33  
34  
35  
36  
37  
38  
39  
40  
41  
42  
43  
44  
45  
46  
47  
48  
49  
50  
51  
52  
53  
54  
55  
56  
57  
58  
59  
60

For peer review only

## ETHICS STATEMENT

### Patient consent for publication

Not required.

## ACKNOWLEDGEMENTS

Editorial assistance and writing support were provided by Paula Casajust, MSc and Stefania Ippati, PhD of TFS HealthScience.

## CONTRIBUTORSHIP STATEMENT

**MA, RS, ED, PL, EdJ, GF, LN, AN, JL, ZR, SG, EM, TO, IK, and UM** were involved in conception and study design. **MA, RS, ED, PL, EdJ, GF, LN, AN, JL, ZR, SG, EM, TO, IK, and UM** provided edits, critiqued the manuscript for intellectual content, and approved the final manuscript.

## COMPETING INTERESTS

**MA** has served as consultant for, or has been a paid speaker for clinical trials sponsored by companies that manufacture drugs used for the treatment of psoriasis, including Abbvie, Almirall, Amgen, Biogen, Boehringer Ingelheim, Celgene, Centocor, Eli-Lilly, GSK, Janssen-Cilag, Leo Pharma, Medac, Merck, MSD, Novartis, Pfizer, UCB, and Xenoport; **RS** has been an advisor and/or received speaker honoraria and/or received grants from AbbVie, Almirall, Beiersdorf, Janssen, LEO Pharma and Novartis; **ED** has the following conflict of interests: Advisory Board member, consultant, grants, research support, participation in clinical trials, honorarium for speaking, research support, with the following pharmaceutical companies: Abbvie/Abbott, Almirall, Amgen, Janssen-Cilag, Leo Pharma, Novartis, Pfizer, MSD-Schering-Plough, Celgene, Lilly, and UCB; **PL** received honoraria and/or grants as an investigator, speaker, and/or advisory board member for AbbVie, Almirall, Actelion, Celgene, Janssen, Lilly, Sanofi, Leo, UCB, and Novartis; **EdJ** has received research grants for the independent research fund of the department of dermatology of the Radboud University

1  
2  
3 Medical Center Nijmegen, The Netherlands from AbbVie, Leo Pharma, Janssen  
4  
5 Pharmaceuticals, Novartis, Pfizer, and UCB and has acted as consultant and/or paid speaker for  
6  
7 and/or participated in research sponsored by companies that manufacture drugs used for the  
8  
9 treatment of psoriasis including AbbVie, Almirall, Celgene, Galapagos, Janssen  
10  
11 Pharmaceutica, Leo Pharma, Lilly, Novartis, Sanofi, and UCB. All funding is not personal but  
12  
13 goes to the independent research fund of the department of dermatology of Radboud University  
14  
15 Medical Center Nijmegen (Radboudumc), The Netherlands; **GF** has acted as speaker and  
16  
17 consultant for AbbVie, Almirall, Eli Lilly, Leo Pharma, Janssen, Novartis, and UCB; **LN**  
18  
19 received consultation fees from Abbvie, Amgen, Boehringer Ingelheim, Celgene, Eli Lilly,  
20  
21 IBSA, Menarini, Janssen, Novartis, and Sanofi; **AN** declares being a consultant and advisor  
22  
23 and/or receiving speaking fees and/or grants and/or served as an investigator in clinical trials  
24  
25 for AbbVie, Almirall, Amgen, BMS, Boehringer Ingelheim, Celgene, Eli Lilly, Galderma,  
26  
27 GSK, LEO Pharma, Janssen-Cilag, MSD, Novartis, Pfizer, Sandoz, Sanofi, Serono and UCB;  
28  
29 **JL** has been a speaker/advisor for and her institution received grants from AbbVie, Almirall,  
30  
31 Argenx, BMS, Celgene, Janssen, LEO Pharma, Eli Lilly, Novartis, Pfizer and UCB; **ZR** has  
32  
33 been an advisor, investigator, and/or speaker for Novartis, Janssen-Cilag, Lilly, eo-Pharma,  
34  
35 Celgene, Pfizer, UCB, Amgen, Almirall, MSD, and MEDAC; **SG** has been an advisor and/or  
36  
37 received speakers' honoraria and/or received grants and/or participated in clinical trials of the  
38  
39 following companies: AbbVie, Affibody AB, Akari Therapeutics Plc, Almirall-Hermal,  
40  
41 Amgen, Anaptys Bio, Argenx BV, AstraZeneca AB, Biogen Idec, Bioskin, Boehringer-  
42  
43 Ingelheim, Celgene, Dermira, Eli Lilly, Forward Pharma, Galderma, Hexal AG, Incyte Inc.,  
44  
45 Janssen-Cilag, Johnson & Johnson, Kymab, Leo Pharma, Medac, MSD, Neubourg Skin Care  
46  
47 GmbH, Novartis, Pfizer, Principia Biopharma, Regeneron Pharmaceutical, Sandoz  
48  
49 Biopharmaceuticals, Sanofi-Aventis, Trevi Therapeutics, and UCB Pharma; **EM** and **IK** are  
50  
51 employees of Almirall; **TO** has served as medical advisor for Almirall; **UM** has been an advisor  
52  
53  
54  
55  
56  
57  
58  
59  
60



1  
2  
3 and/or received speakers' honoraria and/or received grants and/or participated in clinical trials  
4  
5 of the following companies: AbbVie, Aditxt, Almirall, Amgen, Aristeia, Boehringer-Ingelheim,  
6  
7 Bristol-Myers Squibb, Celgene, Dr. Reddy's, Eli Lilly, Foamix, Formycon, Immunic, Janssen,  
8  
9 LEO Pharma, Medac, MetrioPharm, Novartis, Phi-Stone, Pierre Fabre, Sanofi-Aventis, and  
10  
11 UCB Pharma.  
12  
13

#### 14 **FUNDING**

15  
16  
17 This work was supported by Almirall, Barcelona, Spain. Award/grant number: N/A.  
18

#### 19 **DATA SHARING STATEMENT**

20  
21 Not applicable.  
22  
23  
24  
25  
26  
27  
28  
29  
30  
31  
32  
33  
34  
35  
36  
37  
38  
39  
40  
41  
42  
43  
44  
45  
46  
47  
48  
49  
50  
51  
52  
53  
54  
55  
56  
57  
58  
59  
60

## REFERENCES

- 1 Mrowietz U, Reich K. Psoriasis--new insights into pathogenesis and treatment. *Dtsch Arztebl Int* 2009;**106**:11–8, quiz 19. doi:10.3238/arztebl.2009.0011
- 2 Bhosle MJ, Kulkarni A, Feldman SR, *et al.* Quality of life in patients with psoriasis. *Health Qual Life Outcomes* 2006;**4**:35. doi:10.1186/1477-7525-4-35
- 3 Eghlileb AM, Davies EEG, Finlay AY. Psoriasis has a major secondary impact on the lives of family members and partners. *Br J Dermatol* 2007;**156**:1245–50. doi:10.1111/j.1365-2133.2007.07881.x
- 4 Villacorta R, Teeple A, Lee S, *et al.* A multinational assessment of work-related productivity loss and indirect costs from a survey of patients with psoriasis. *Br J Dermatol* 2020;**183**:548–58. doi:10.1111/bjd.18798
- 5 Global report on psoriasis. <https://www.who.int/publications-detail-redirect/global-report-on-psoriasis> (accessed 17 Nov 2021).
- 6 Koo J, Marangell L b., Nakamura M, *et al.* Depression and suicidality in psoriasis: review of the literature including the cytokine theory of depression. *J Eur Acad Dermatol Venereol* 2017;**31**:1999–2009. doi:10.1111/jdv.14460
- 7 Sallemi R, Bouhamed M, Masmoudi R, *et al.* Anxiety and depressive symptoms in patients with psoriasis. *Eur Psychiatry* 2021;**64**:S183–4. doi:10.1192/j.eurpsy.2021.485
- 8 Dubertret L, Mrowietz U, Ranki A, *et al.* European patient perspectives on the impact of psoriasis: the EUOPSO patient membership survey. *Br J Dermatol* 2006;**155**:729–36. doi:10.1111/j.1365-2133.2006.07405.x
- 9 Palota T, Szepietowski JC, Pec J, *et al.* A survey of disease severity, quality of life, and treatment patterns of biologically naive patients with psoriasis in central and eastern Europe. *Acta Dermatovenerol Croat* 2010;**18**:151–61.

- 1  
2  
3 10 Naldi L. Scoring and monitoring the severity of psoriasis. What is the preferred method?  
4  
5 What is the ideal method? Is PASI passé? facts and controversies. *Clin Dermatol*  
6  
7 2010;**28**:67–72. doi:10.1016/j.clindermatol.2009.03.001  
8  
9
- 10 11 Korman NJ, Zhao Y, Pike J, *et al.* Relationship between psoriasis severity, clinical  
11  
12 symptoms, quality of life and work productivity among patients in the USA. *Clin Exp*  
13  
14 *Dermatol* 2016;**41**:514–21. doi:10.1111/ced.12841  
15  
16
- 17 12 Berth-Jones J, Grotzinger K, Rainville C, *et al.* A study examining inter- and intrarater  
18  
19 reliability of three scales for measuring severity of psoriasis: Psoriasis Area and Severity  
20  
21 Index, Physician’s Global Assessment and Lattice System Physician’s Global Assessment.  
22  
23 *Br J Dermatol* 2006;**155**:707–13. doi:10.1111/j.1365-2133.2006.07389.x  
24  
25
- 26 13 Puzenat E, Bronsard V, Prey S, *et al.* What are the best outcome measures for assessing  
27  
28 plaque psoriasis severity? A systematic review of the literature. *J Eur Acad Dermatol*  
29  
30 *Venereol* 2010;**24 Suppl 2**:10–6. doi:10.1111/j.1468-3083.2009.03562.x  
31  
32
- 33 14 da Silva MFP, Fortes MRP, Miot LDB, *et al.* Psoriasis: correlation between severity index  
34  
35 (PASI) and quality of life index (DLQI) in patients assessed before and after systemic  
36  
37 treatment. *An Bras Dermatol* 2013;**88**:760–3. doi:10.1590/abd1806-4841.20132052  
38  
39
- 40 15 Twiss J, Meads DM, Preston EP, *et al.* Can We Rely on the Dermatology Life Quality Index  
41  
42 as a Measure of the Impact of Psoriasis or Atopic Dermatitis? *J Invest Dermatol*  
43  
44 2012;**132**:76–84. doi:10.1038/jid.2011.238  
45  
46
- 47 16 Langenbruch A, Radtke MA, Gutknecht M, *et al.* Does the Dermatology Life Quality Index  
48  
49 (DLQI) underestimate the disease-specific burden of psoriasis patients? *J Eur Acad*  
50  
51 *Dermatol Venereol* 2019;**33**:123–7. doi:10.1111/jdv.15226  
52  
53
- 54 17 Ali FM, Johns N, Salek S, *et al.* Correlating the Dermatology Life Quality Index with  
55  
56 psychiatric measures: A systematic review. *Clin Dermatol* 2018;**36**:691–7.  
57  
58 doi:10.1016/j.clindermatol.2018.08.014  
59  
60

- 1  
2  
3 18 Pattinson RL, Trialonis-Suthakharan N, Gupta S, *et al.* Patient-Reported Outcome  
4 Measures in Dermatology: A Systematic Review. *Acta Derm Venereol*  
5 2021;**101**:adv00559. doi:10.2340/00015555-3884  
6  
7  
8  
9  
10 19 Feldman SR, Regnier SA, Chirilov A, *et al.* Patient-reported outcomes are important  
11 elements of psoriasis treatment decision making: A discrete choice experiment survey of  
12 dermatologists in the United States. *J Am Acad Dermatol* 2019;**80**:1650–7.  
13 doi:10.1016/j.jaad.2019.01.039  
14  
15  
16  
17  
18 20 Montenegro H, Ramagem C, Kawar R, *et al.* Making Progress in People-centred Care:  
19 Country Experiences and Lessons Learnt. *Int J Pers Cent Med* 2012;**2**:64–72.  
20 doi:10.5750/ijpcm.v2i1.93  
21  
22  
23  
24  
25 21 Augustin M, Alvaro-Gracia JM, Bagot M, *et al.* A framework for improving the quality of  
26 care for people with psoriasis. *J Eur Acad Dermatol Venereol* 2012;**26 Suppl 4**:1–16.  
27 doi:10.1111/j.1468-3083.2012.04576.x  
28  
29  
30  
31  
32 22 Masson E. Joint AAD-NPF guidelines of care for the management and treatment of  
33 psoriasis with biologics. EM-Consulte. [https://www.em-](https://www.em-consulte.com/article/1281151/joint-aad-npf-guidelines-of-care-for-the-managemen)  
34 [consulte.com/article/1281151/joint-aad-npf-guidelines-of-care-for-the-managemen](https://www.em-consulte.com/article/1281151/joint-aad-npf-guidelines-of-care-for-the-managemen)  
35 (accessed 18 May 2021).  
36  
37  
38  
39  
40  
41 23 Armstrong AW, Puig L, Joshi A, *et al.* Comparison of Biologics and Oral Treatments for  
42 Plaque Psoriasis: A Meta-analysis. *JAMA Dermatol* 2020;**156**:258–69.  
43 doi:10.1001/jamadermatol.2019.4029  
44  
45  
46  
47  
48 24 Langenbruch A, Mohr N, Kirsten N, *et al.* Quality of psoriasis care in Germany - results  
49 from the nationwide health care studies PsoHealth 2004-2017. *J Eur Acad Dermatol*  
50 *Venereol* 2021;**35**:1536–42. doi:10.1111/jdv.17220  
51  
52  
53  
54  
55  
56  
57  
58  
59  
60

- 1  
2  
3 25 Tada Y, Watanabe R, Noma H, *et al.* Short-term effectiveness of biologics in patients with  
4 moderate-to-severe plaque psoriasis: A systematic review and network meta-analysis. *J*  
5  
6 *Dermatol Sci* 2020;**99**:53–61. doi:10.1016/j.jdermsci.2020.06.003  
7  
8  
9  
10 26 Augustin M, Wirth D, Mahlich J, *et al.* Cost per responder analysis of guselkumab versus  
11 targeted therapies in the treatment of moderate to severe plaque psoriasis in Germany. *J*  
12 *Dermatolog Treat* 2020;:1–7. doi:10.1080/09546634.2020.1793891  
13  
14  
15  
16 27 Augustin M, McBride D, Gilloteau I, *et al.* Cost-effectiveness of secukinumab as first  
17 biologic treatment, compared with other biologics, for moderate to severe psoriasis in  
18 Germany. *J Eur Acad Dermatol Venereol* 2018;**32**:2191–9. doi:10.1111/jdv.15047  
19  
20  
21  
22 28 Crowley JJ, Warren RB, Cather JC. Safety of selective IL-23p19 inhibitors for the treatment  
23 of psoriasis. *J Eur Acad Dermatol Venereol* 2019;**33**:1676–84. doi:10.1111/jdv.15653  
24  
25  
26  
27 29 Reich K, Papp KA, Blauvelt A, *et al.* Tildrakizumab versus placebo or etanercept for  
28 chronic plaque psoriasis (reSURFACE 1 and reSURFACE 2): results from two randomised  
29 controlled, phase 3 trials. *Lancet* 2017;**390**:276–88. doi:10.1016/S0140-6736(17)31279-5  
30  
31  
32  
33 30 Imafuku S, Kanai Y, Murotani K, *et al.* Utility of the Dermatology Life Quality Index at  
34 initiation or switching of biologics in real-life Japanese patients with plaque psoriasis:  
35 Results from the ProLOGUE study. *J Dermatol Sci* 2021;**101**:185–93.  
36 doi:10.1016/j.jdermsci.2021.01.002  
37  
38  
39  
40 31 Strober BE, van der Walt JM, Armstrong AW, *et al.* Clinical Goals and Barriers to Effective  
41 Psoriasis Care. *Dermatol Ther (Heidelb)* 2019;**9**:5–18. doi:10.1007/s13555-018-0279-5  
42  
43  
44  
45 32 Fleming P, Bai JW, Pratt M, *et al.* The prevalence of anxiety in patients with psoriasis: a  
46 systematic review of observational studies and clinical trials. *J Eur Acad Dermatol*  
47 *Venereol* 2017;**31**:798–807. doi:10.1111/jdv.13891  
48  
49  
50  
51  
52  
53  
54  
55  
56  
57  
58  
59  
60

- 1  
2  
3 33 Korman AM, Hill D, Alikhan A, *et al.* Impact and management of depression in psoriasis  
4 patients. *Expert Opin Pharmacother* 2016;**17**:147–52.  
5  
6 doi:10.1517/14656566.2016.1128894  
7  
8  
9  
10 34 Rzeszutek M, Podkowa K, Pięta M, *et al.* Comparative study of life satisfaction among  
11 patients with psoriasis versus healthy comparison group: the explanatory role of body image  
12 and resource profiles. *Qual Life Res* 2021;**30**:181–91. doi:10.1007/s11136-020-02621-3  
13  
14  
15  
16 35 Fortune DG, Richards HL, Kirby B, *et al.* Successful treatment of psoriasis improves  
17 psoriasis-specific but not more general aspects of patients' well-being. *Br J Dermatol*  
18 2004;**151**:1219–26. doi:https://doi.org/10.1111/j.1365-2133.2004.06222.x  
19  
20  
21  
22  
23 36 Blome C, Augustin M, Behechtnejad J, *et al.* Dimensions of patient needs in dermatology:  
24 subscales of the patient benefit index. *Arch Dermatol Res* 2011;**303**:11–7.  
25  
26 doi:10.1007/s00403-010-1073-0  
27  
28  
29  
30 37 Blome C, Costanzo A, Dauden E, *et al.* Patient-relevant needs and treatment goals in nail  
31 psoriasis. *Qual Life Res* 2016;**25**:1179–88. doi:10.1007/s11136-015-1136-y  
32  
33  
34  
35 38 da Silva N, Augustin M, Langenbruch A, *et al.* Disease burden and treatment needs of  
36 patients with psoriasis in sexually-sensitive and visible body areas: results from a large-  
37 scale survey in routine care. *Eur J Dermatol* 2020;**30**:267–78. doi:10.1684/ejd.2020.3768  
38  
39  
40  
41 39 da Silva N, Augustin M, Langenbruch A, *et al.* Sex-related impairment and patient  
42 needs/benefits in anogenital psoriasis: Difficult-to-communicate topics and their impact on  
43 patient-centred care. *PLoS One* 2020;**15**:e0235091. doi:10.1371/journal.pone.0235091  
44  
45  
46  
47 40 The World Health Organisation- Five Well-Being Index (WHO-5).  
48  
49 [https://www.corc.uk.net/outcome-experience-measures/the-world-health-organisation-](https://www.corc.uk.net/outcome-experience-measures/the-world-health-organisation-five-well-being-index-who-5/)  
50  
51 [five-well-being-index-who-5/](https://www.corc.uk.net/outcome-experience-measures/the-world-health-organisation-five-well-being-index-who-5/) (accessed 18 May 2021).  
52  
53  
54  
55  
56  
57  
58  
59  
60

- 1  
2  
3 41 Sustainable Development Goals 3 - The Global Action Plan for Healthy Lives and Well-  
4 being for All. <https://www.who.int/initiatives/sdg3-global-action-plan> (accessed 17 Nov  
5 2021).  
6  
7  
8  
9  
10 42 Schuster B, Ziehfreund S, Albrecht H, *et al.* Happiness in dermatology: a holistic evaluation  
11 of the mental burden of skin diseases. *J Eur Acad Dermatol Venereol* 2020;**34**:1331–9.  
12 doi:10.1111/jdv.16146  
13  
14  
15  
16 43 Topp CW, Østergaard SD, Søndergaard S, *et al.* The WHO-5 Well-Being Index: A  
17 Systematic Review of the Literature. *Psychother Psychosom* 2015;**84**:167–76.  
18 doi:10.1159/000376585  
19  
20  
21  
22  
23 44 Mrowietz U, Hartmann A, Weißmann W, *et al.* FamilyPso - a new questionnaire to assess  
24 the impact of psoriasis on partners and family of patients. *J Eur Acad Dermatol Venereol*  
25 2017;**31**:127–34. doi:10.1111/jdv.13872  
26  
27  
28  
29  
30 45 Rencz F, Gulácsi L, Péntek M, *et al.* Proposal of a new scoring formula for the Dermatology  
31 Life Quality Index in psoriasis. *Br J Dermatol* 2018;**179**:1102–8. doi:10.1111/bjd.16927  
32  
33  
34  
35 46 Augustin M, Radtke MA, Zschocke I, *et al.* The patient benefit index: a novel approach in  
36 patient-defined outcomes measurement for skin diseases. *Arch Dermatol Res*  
37 2009;**301**:561–71. doi:10.1007/s00403-009-0928-8  
38  
39  
40  
41  
42 47 Bharmal M, Payne K, Atkinson MJ, *et al.* Validation of an abbreviated Treatment  
43 Satisfaction Questionnaire for Medication (TSQM-9) among patients on antihypertensive  
44 medications. *Health Qual Life Outcomes* 2009;**7**:36. doi:10.1186/1477-7525-7-36  
45  
46  
47  
48 48 Schaarschmidt M-L, Kromer C, Herr R, *et al.* Treatment satisfaction of patients with  
49 psoriasis. *Acta Derm Venereol* 2015;**95**:572–8. doi:10.2340/00015555-2011  
50  
51  
52  
53 49 Wu JJ, Lin C, Sun L, *et al.* Minimal clinically important difference (MCID) for work  
54 productivity and activity impairment (WPAI) questionnaire in psoriasis patients. *J Eur*  
55 *Acad Dermatol Venereol* 2019;**33**:318–24. doi:10.1111/jdv.15098  
56  
57  
58  
59  
60

- 1  
2  
3 50 Kimball AB, Naegeli AN, Edson-Heredia E, *et al.* Psychometric properties of the Itch  
4  
5 Numeric Rating Scale in patients with moderate-to-severe plaque psoriasis. *Br J Dermatol*  
6  
7 2016;**175**:157–62. doi:10.1111/bjd.14464  
8  
9  
10 51 Langley RG, Ellis CN. Evaluating psoriasis with Psoriasis Area and Severity Index,  
11  
12 Psoriasis Global Assessment, and Lattice System Physician’s Global Assessment. *J Am*  
13  
14 *Acad Dermatol* 2004;**51**:563–9. doi:10.1016/j.jaad.2004.04.012  
15  
16  
17 52 Langley RGB, Feldman SR, Nyirady J, *et al.* The 5-point Investigator’s Global Assessment  
18  
19 (IGA) Scale: A modified tool for evaluating plaque psoriasis severity in clinical trials. *J*  
20  
21 *Dermatolog Treat* 2015;**26**:23–31. doi:10.3109/09546634.2013.865009  
22  
23  
24 53 The Professional Quality of Life Scale – 5 (ProQOL). NovoPsych.  
25  
26 2021. [https://novopsych.com.au/assessments/clinician-self-assessment/the-professional-](https://novopsych.com.au/assessments/clinician-self-assessment/the-professional-quality-of-life-scale-5-proqol/)  
27  
28 [quality-of-life-scale-5-proqol/](https://novopsych.com.au/assessments/clinician-self-assessment/the-professional-quality-of-life-scale-5-proqol/) (accessed 17 Nov 2021).  
29  
30  
31 54 Liu L, Li S, Zhao Y, *et al.* Health state utilities and subjective well-being among psoriasis  
32  
33 vulgaris patients in mainland China. *Qual Life Res* 2018;**27**:1323–33. doi:10.1007/s11136-  
34  
35 018-1819-2  
36  
37  
38  
39  
40  
41  
42  
43  
44  
45  
46  
47  
48  
49  
50  
51  
52  
53  
54  
55  
56  
57  
58  
59  
60



1  
2  
3 **FIGURE LEGENDS**  
4

5 **Figure 1.** Study design of the POSITIVE study  
6  
7  
8  
9  
10  
11  
12  
13  
14  
15  
16  
17  
18  
19  
20  
21  
22  
23  
24  
25  
26  
27  
28  
29  
30  
31  
32  
33  
34  
35  
36  
37  
38  
39  
40  
41  
42  
43  
44  
45  
46  
47  
48  
49  
50  
51  
52  
53  
54  
55  
56  
57  
58  
59  
60

For peer review only

1  
2  
3  
4  
5  
6  
7  
8  
9  
10  
11  
12  
13  
14  
15  
16  
17  
18  
19  
20  
21  
22  
23  
24  
25  
26  
27  
28  
29  
30  
31  
32  
33  
34  
35  
36  
37  
38  
39  
40  
41  
42  
43  
44  
45  
46  
47  
48  
49  
50  
51  
52  
53  
54  
55  
56  
57  
58  
59  
60



254x190mm (300 x 300 DPI)
